# Supplementary material for: 5-Azacytidine Downregulates the Proliferation and Migration of Hepatocellular Carcinoma Cells In Vitro and In Vivo by Targeting miR-139-5p/ROCK2 Pathway
Source: MDPI journal article supplement (doi:10.3390/cancers14071630), 2022-03-23
Supplement: s1 [file s1]

Figure S1

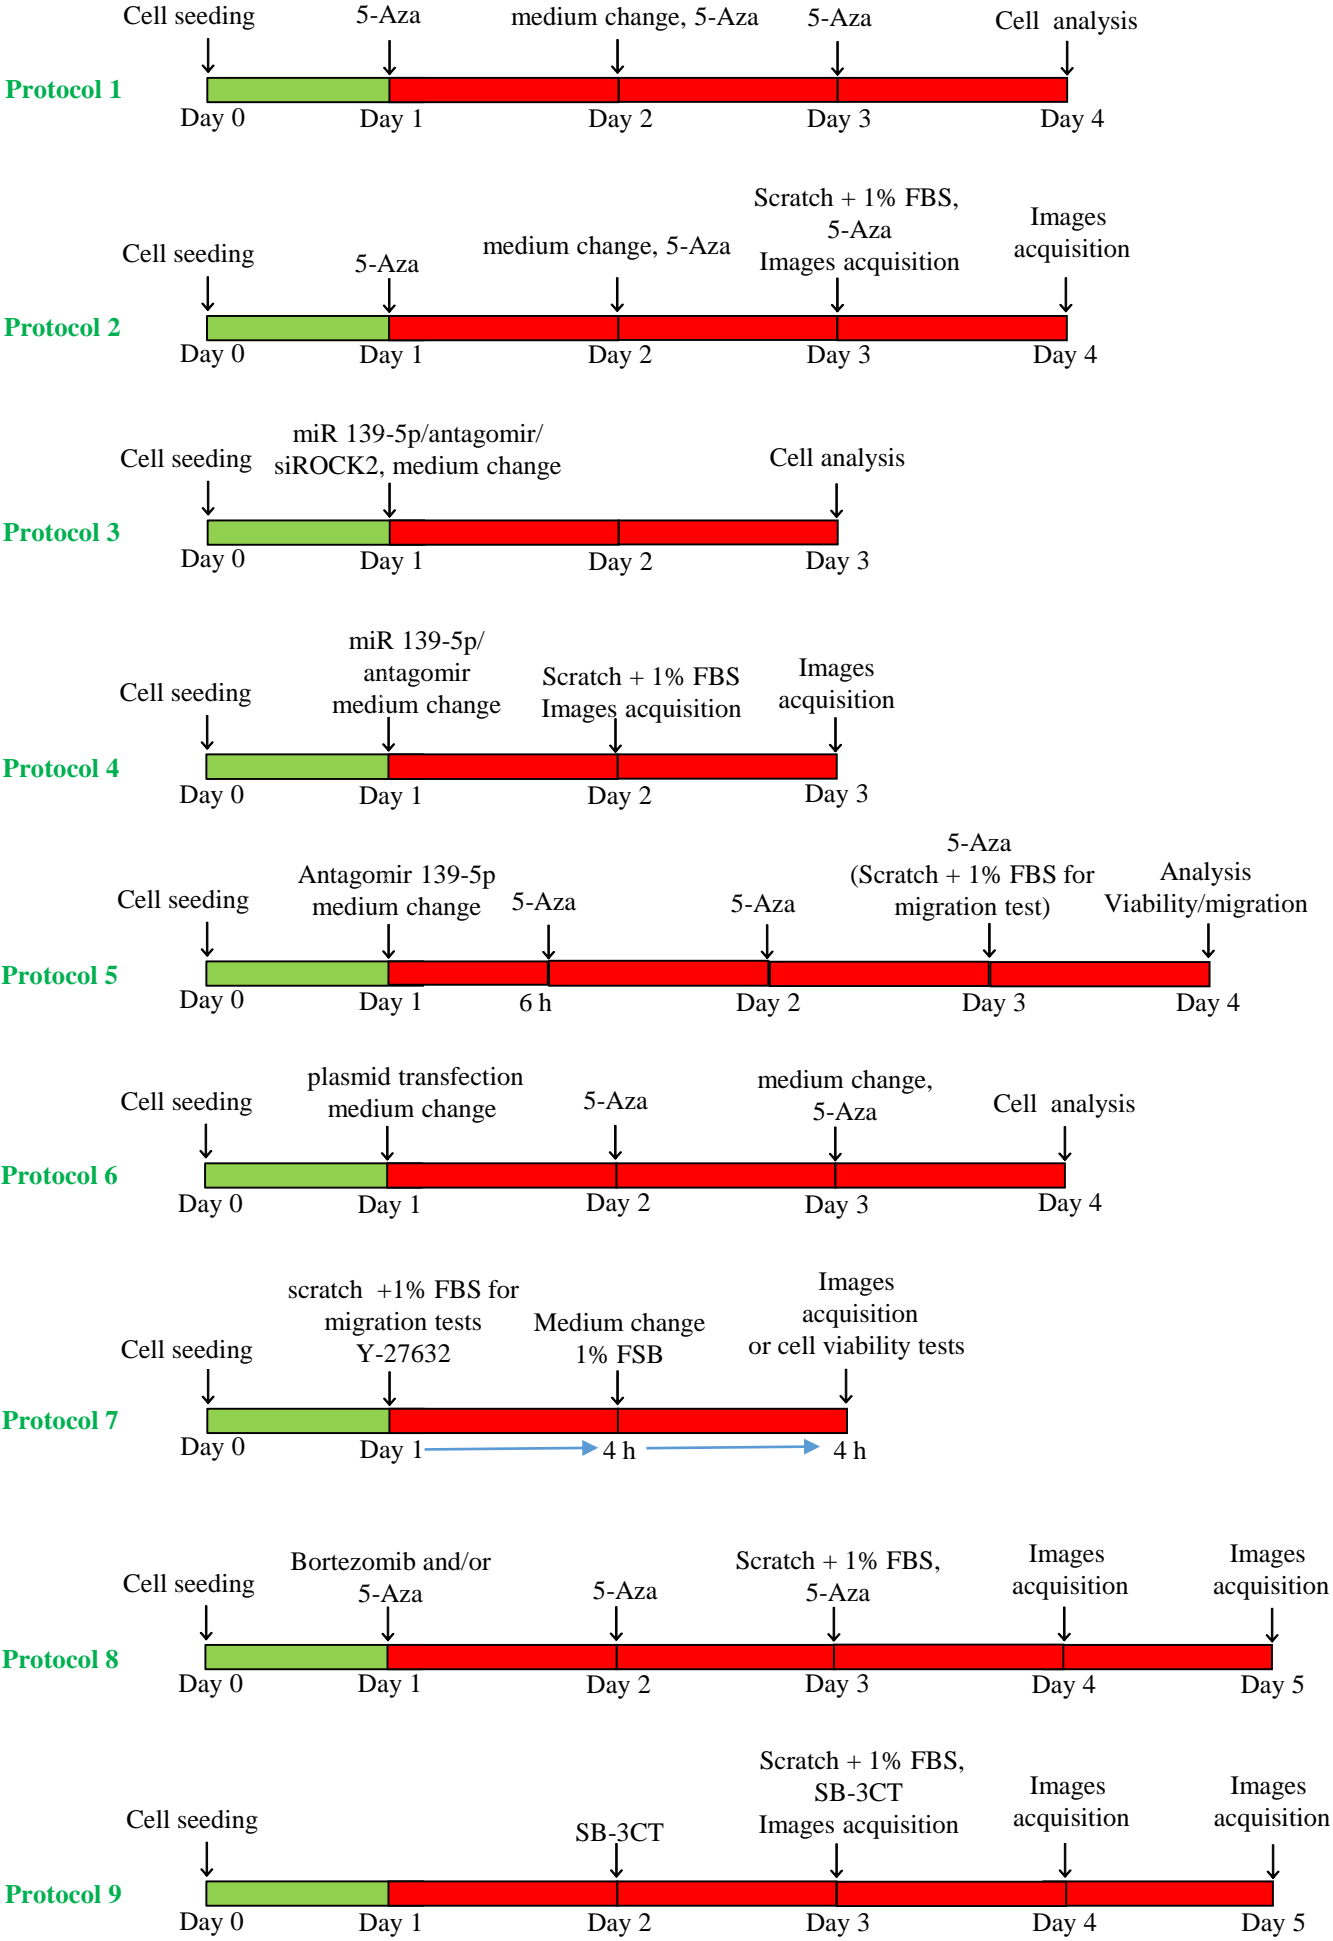

Figure S2

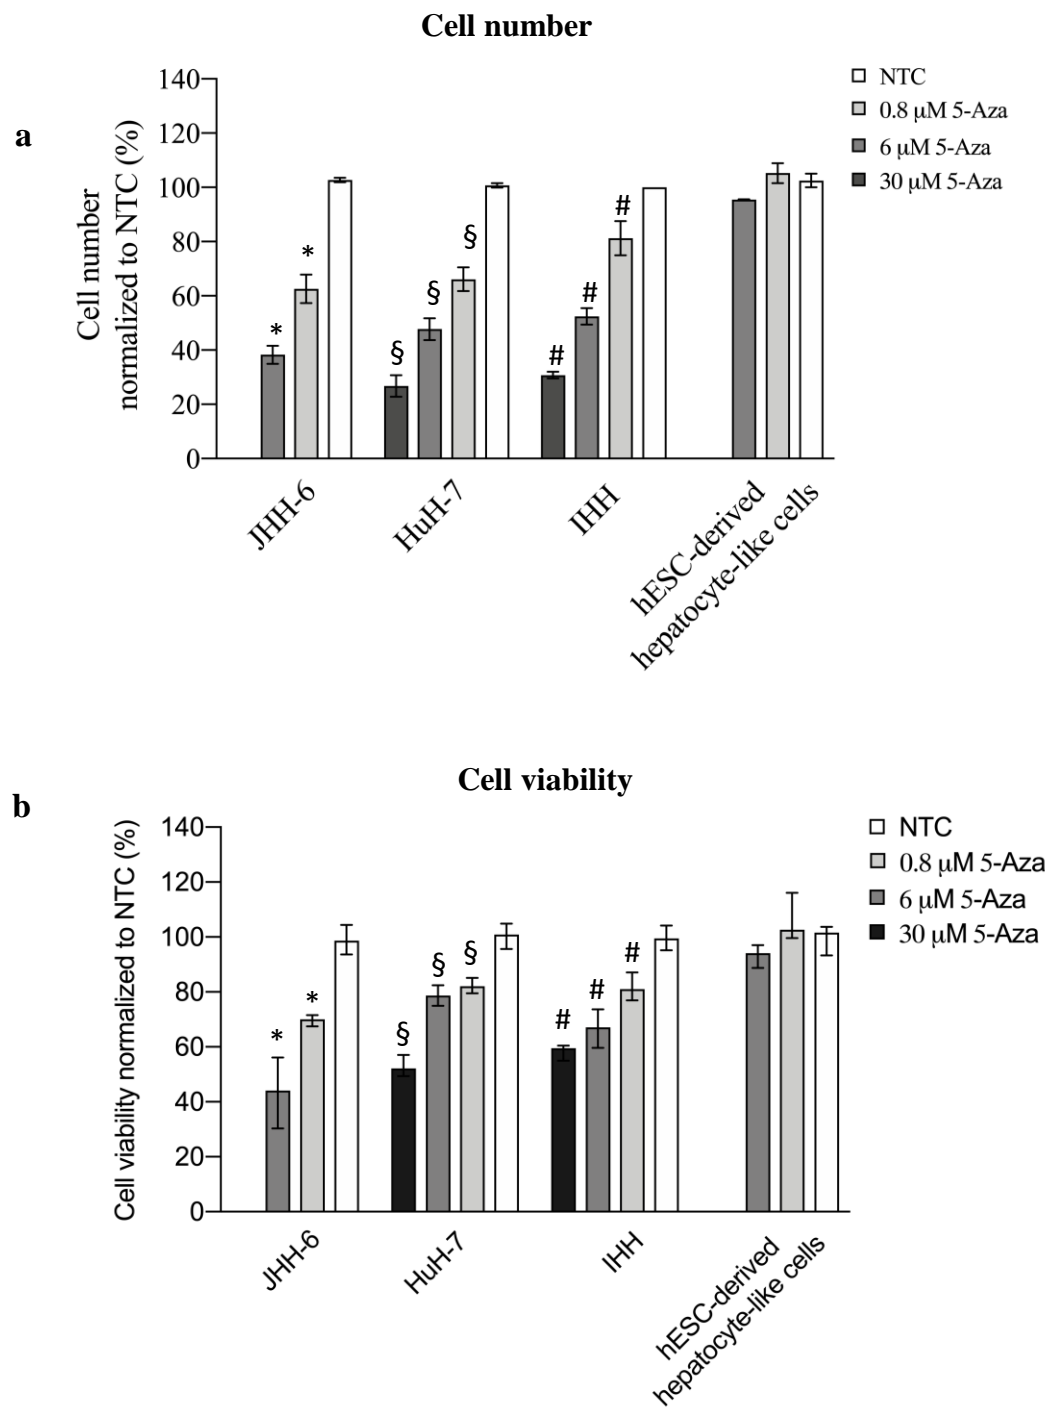

**a)** Effects on cell number. Data, expressed as mean  $\pm$  SEM, are reported as percentage normalized to the average of NTC (Non Treated Cells). JHH-6/5-Aza vs JHH-6/NTC \* $p < 0.0001$ ,  $n = 12$ ; HuH-7/5-Aza vs HuH-7/NTC § $p < 0.0001$ ,  $n = 10$ ; IHH/5-Aza vs IHH/NTC, # $p < 0.0001$ ,  $n = 10$ ; hESC-derived hepatocyte-like cells/5-Aza vs hESC-derived hepatocyte-like cells/NTC,  $n = 10$ . **b)** Effects on cell viability. Data are reported as percentage normalized to the average of NTC. JHH6/5-Aza vs JHH-6/NTC \* $p < 0.0001$ , data are reported as mean  $\pm$  SEM,  $n = 10$ ; HuH-7/5-Aza vs HuH-7/NTC § $p < 0.0001$ , data expressed as mean  $\pm$  SEM,  $n = 6$ ; IHH/5-Aza vs IHH/NTC, # $p < 0.0001$ ,  $n = 10$ , data are reported as median with interquartile range; hESC-derived hepatocyte-like cells,  $n = 3$ , data expressed as median with interquartile range.

**c**

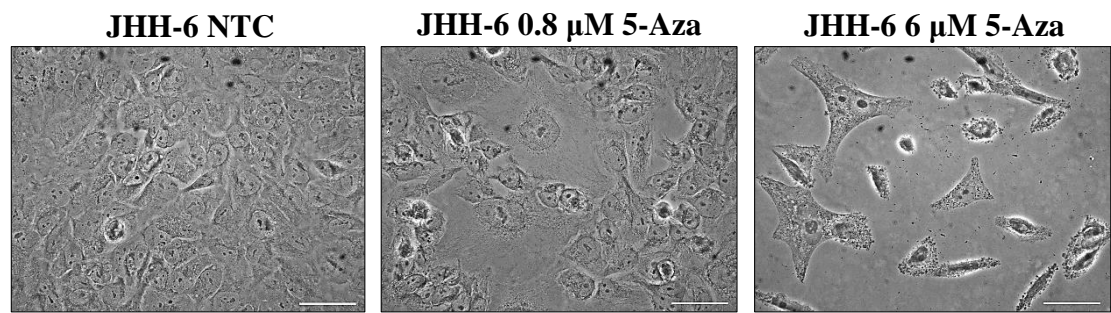

**d**

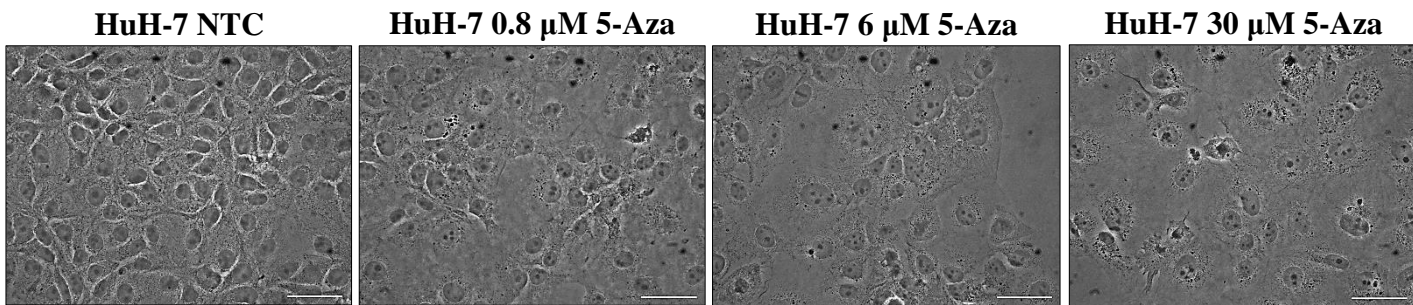

**e**

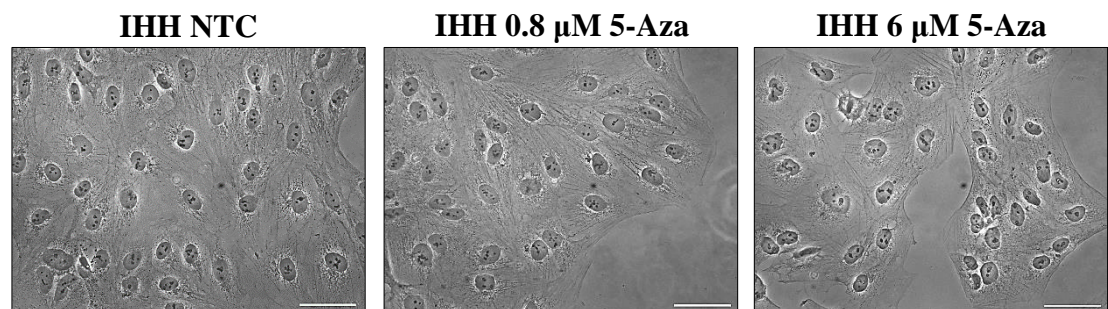

**f**

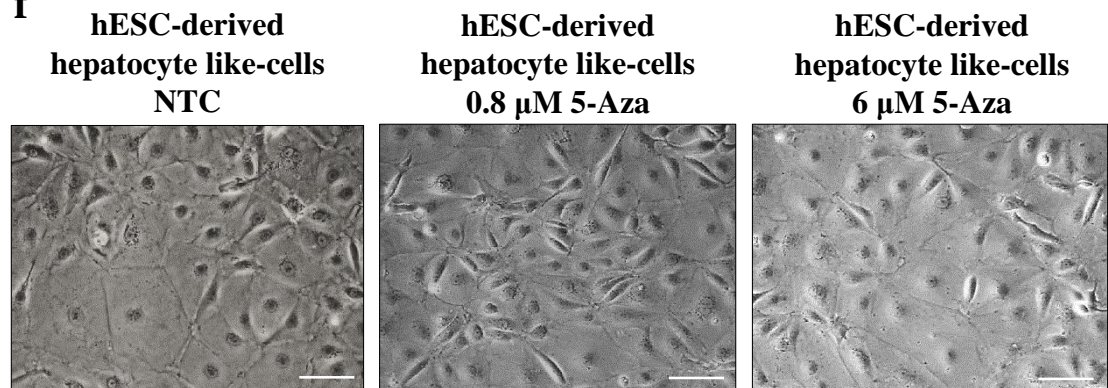

**c-f)** Cell morphology following 5-Azacytidine treatment . Images were acquired with phase-contrast microscope (Leica DM 2000). Magnification (bar = 50  $\mu$ m).



Figure S3

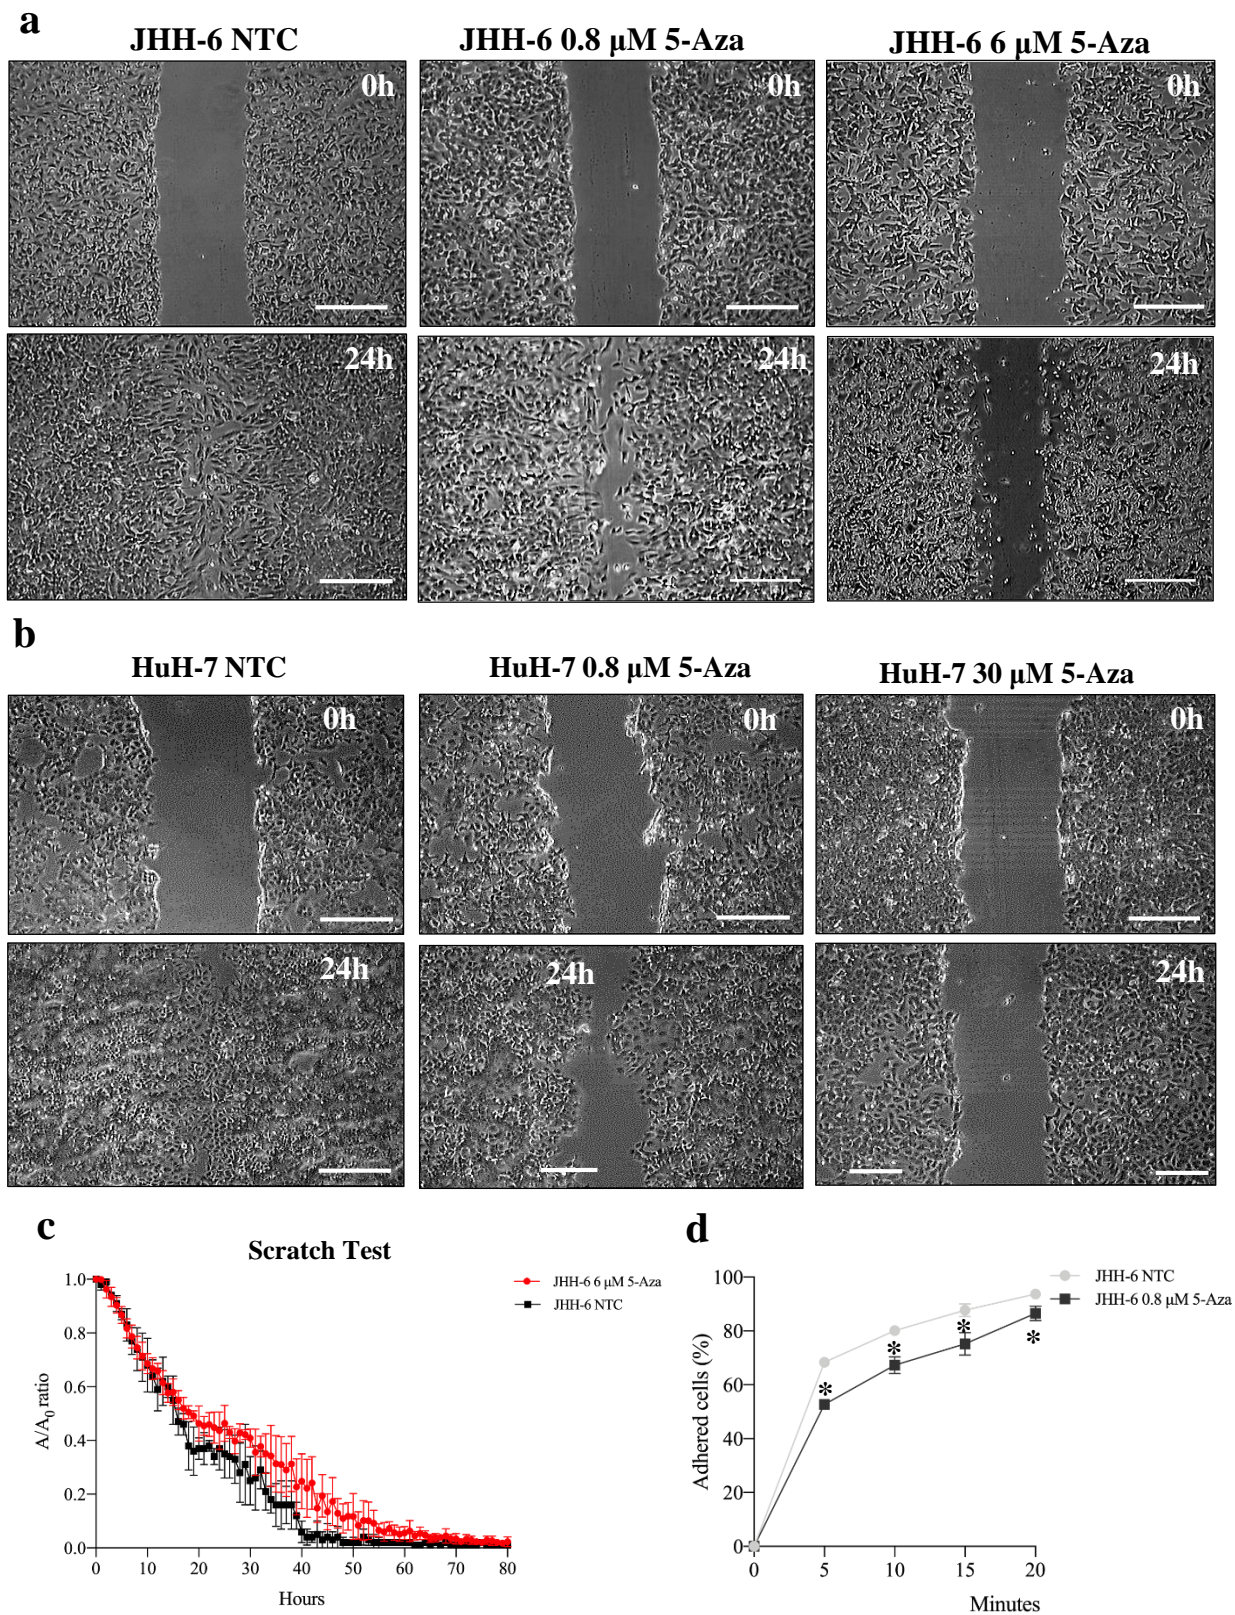

**a-b)** *JHH-6 and HuH-7 migration.* Representative images of scratch assay are reported. Images were acquired with Leica DM IRB microscope, (bar = 50 $\mu$ m). **C)** *Time-lapse analysis.* The kinetic of scratch closing was followed by time-laps in JHH-6, JHH-6 6 $\mu$ M 5-Aza vs JHH-6 NTC (non treated)  $p=0.00001$ , data, expressed as  $A/A_0$ , are represented as mean  $\pm$  SD;  $A$ =area of the cell free region at a given time,  $A_0$  area at the beginning of the test). **D)** *JHH-6 adhesion.* Data are reported as mean  $\pm$  SEM, JHH-6/5-Aza vs JHH-6/NTC \* $p<0.05$ ,  $n=4$ .

# Figure S4

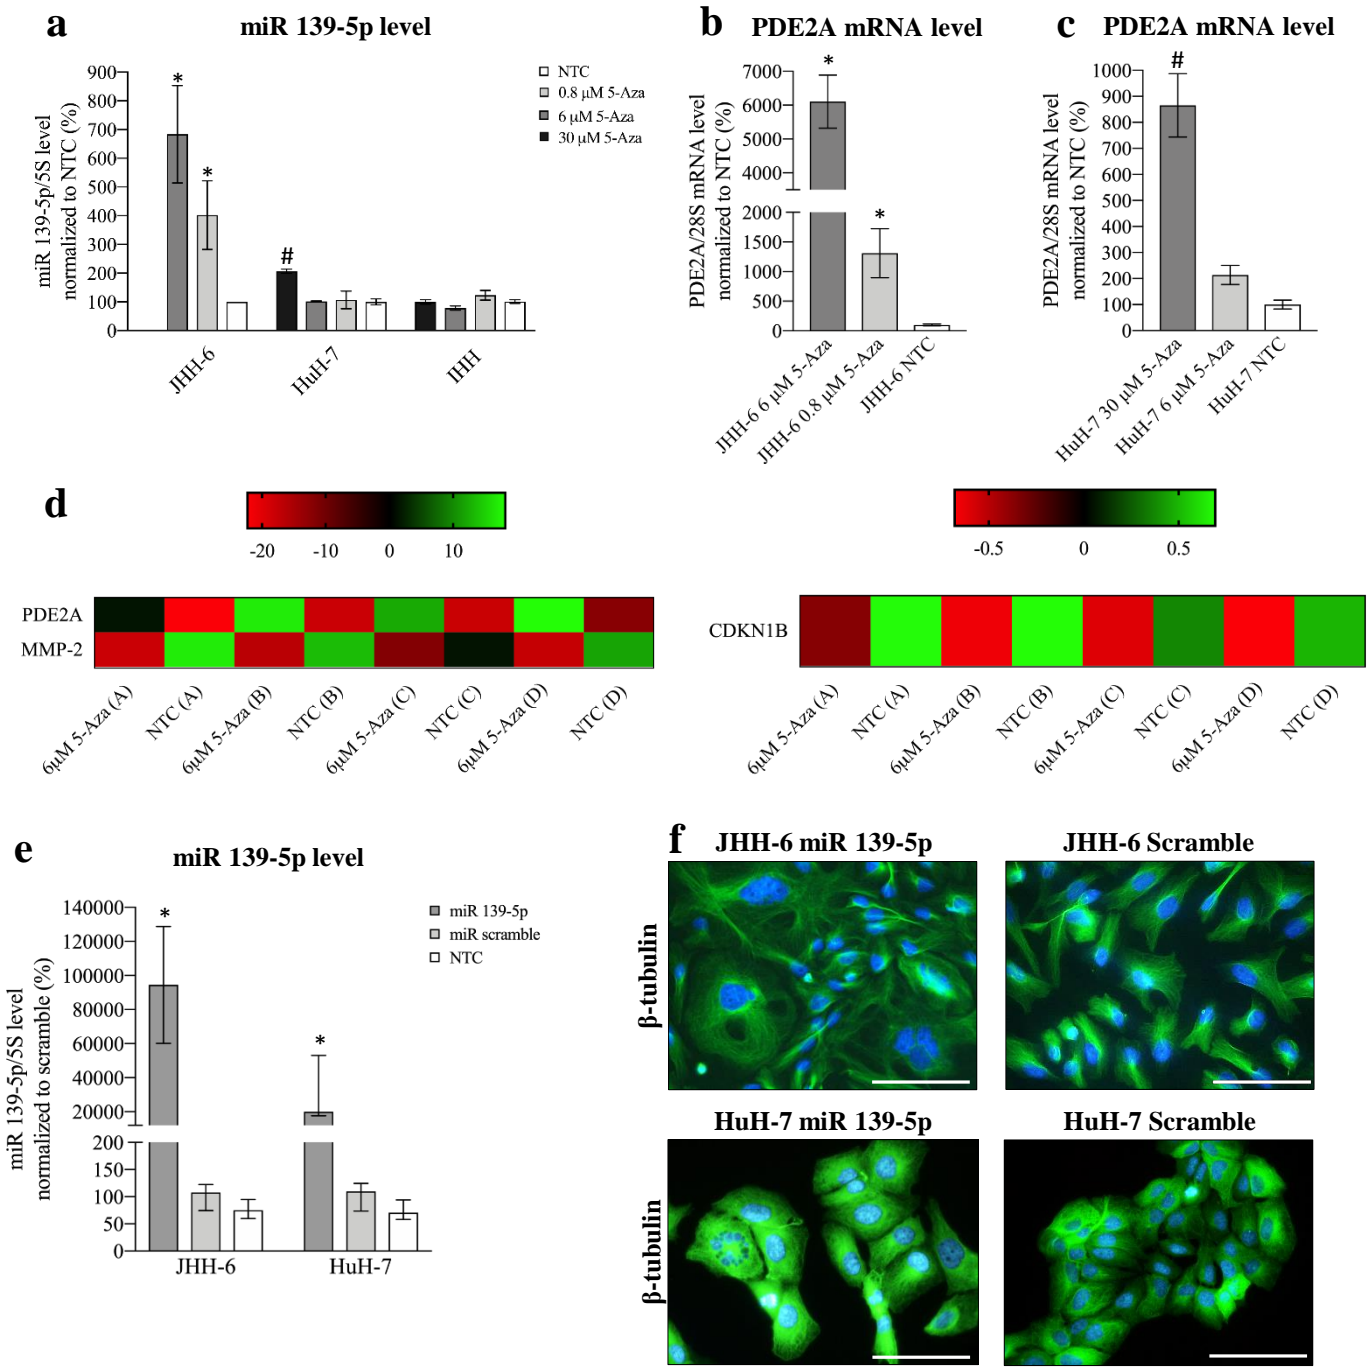

**a)** *miR 139-5p levels after 5-Aza treatment.* Data, expressed as percentage of NTC (non treated cells), are reported as mean  $\pm$  SEM,  $n=9$ , NTC/JHH-6 vs 0,8-6 $\mu$ M/JHH-6 \* $p=0.0063$ ; HuH-7/NTC vs 30  $\mu$ M/JHH-6 # $p=0.0001$ . **b,c)** *PDE2A levels after 5-Aza treatment.* Data, expressed as percentage of NTC, are represented as mean  $\pm$  SEM,  $n=9$ , NTC/JHH-6 vs 0,8-6 $\mu$ M/JHH-6 \* $p<0.0015$ ; NTC/HuH-7 vs 30  $\mu$ M/HuH-7 # $p=0.0034$ . **d)** *Expression levels of PDE2A, MMP-2 and CDKN1B (cyclin B1).* Evaluation by microchip analysis in JHH-6 treated by 5-Aza (6 $\mu$ M) vs NTC; the data measured for each of the four couples of sample tested are reported (couples letter: A,B,C,D); the extent of the differential expression is quantified by a red-green scale above each measurement. **e)** *miR 139-5p levels following transfection.* Data are reported as median with interquartile range, scramble/JHH-6 vs miR 139-5p/JHH-6 and scramble/HuH-7 vs miR 139-5p/HuH-7, \* $p<0.0022$ ,  $n=9$ . **f)** *Immunostaining of  $\beta$ -tubulin in JHH-6 (up) and HuH-7 (down) cells.* Images were acquired with Leica DM 2000 microscope. Green =  $\beta$ -tubulin, Blue=DAPI, bar=100 $\mu$ m.



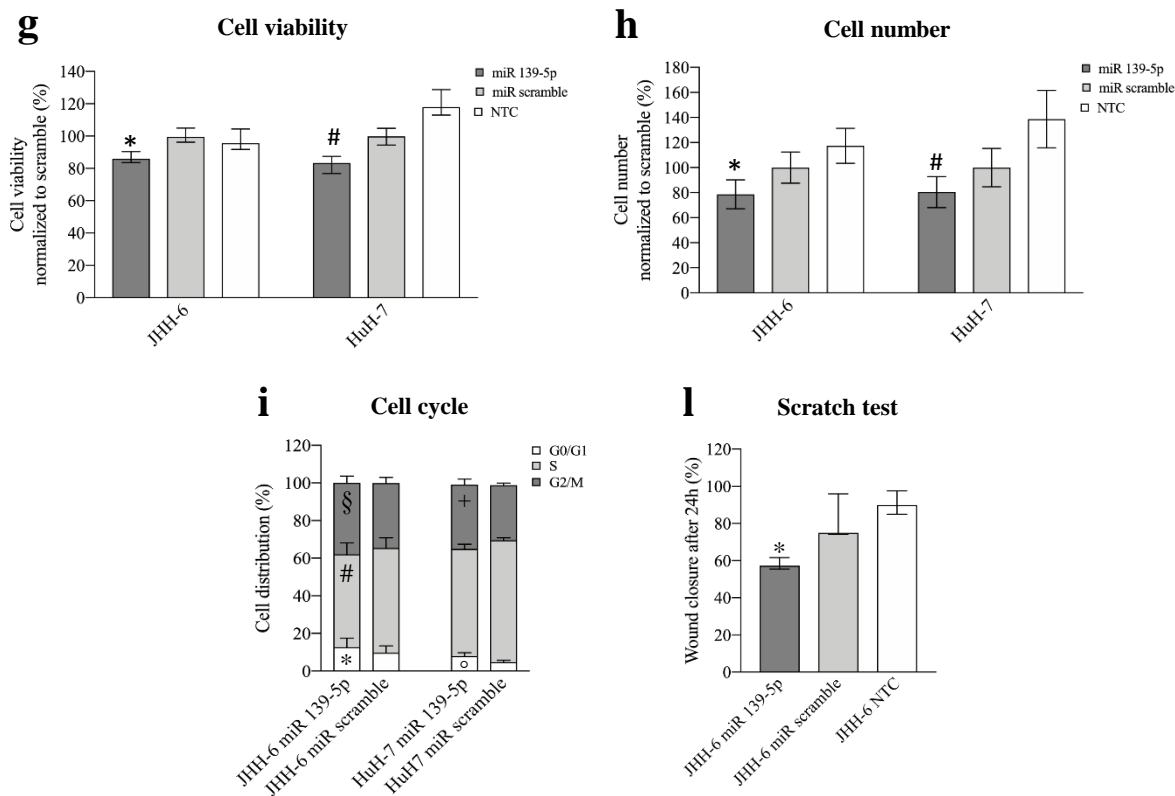

**g** JHH-6/HuH-7 cell viability (MTT assay) following miR 139-5p mimic transfection. Data, normalized to the average of the miR scramble (scr), are represented as median with interquartile range, n=12, JHH-6/scr vs JHH-6/miR 139-5p \*p=0.0001; HuH-7/scr vs HuH-7/miR 139-5p #p=0.0001. **h** JHH-6/HuH-7 cell number following miR 139-5p mimic transfection. JHH-6/scr vs JHH-6/miR 139-5p \*p=0.0078, n=8, data, normalized to the average of miR scr treated cells, are represented as mean  $\pm$  SEM; HuH-7/scr vs HuH-7/miR 139-5p #p=0.0017, data, normalized to the average of scr treated cells, are reported as mean  $\pm$  SEM. **i** Cell cycle phase distribution in JHH-6/HuH-7 after miR 139-5p mimic transfection. JHH-6 scr G0/G1 vs JHH-6 miR 139-5p G0/G1 \*p=0.0098, JHH-6 scr S vs JHH-6 miR 139-5p S #p=0.027, JHH-6 scr G2/M vs JHH-6 miR 139-5p G2/M §p=0.025, data, expressed as percentage, are represented as mean  $\pm$  SEM, n=8; HuH-7 scr G0/G1 vs HuH-7 miR 139-5p G0/G1 °p=0.0001, HuH-7 scr G2/M vs HuH-7 miR 139-5p G2/M +p=0.049, data, expressed as percentage, are represented as mean  $\pm$  SEM, n=6. **l** Migration of miR 139-5p mimic-transfected JHH-6 (scratch assay). Data, normalized to NTC, are represented as median with interquartile range, n=4, JHH-6 scr vs JHH-6 miR 139-5p \*p=0.0001.

Figure S5

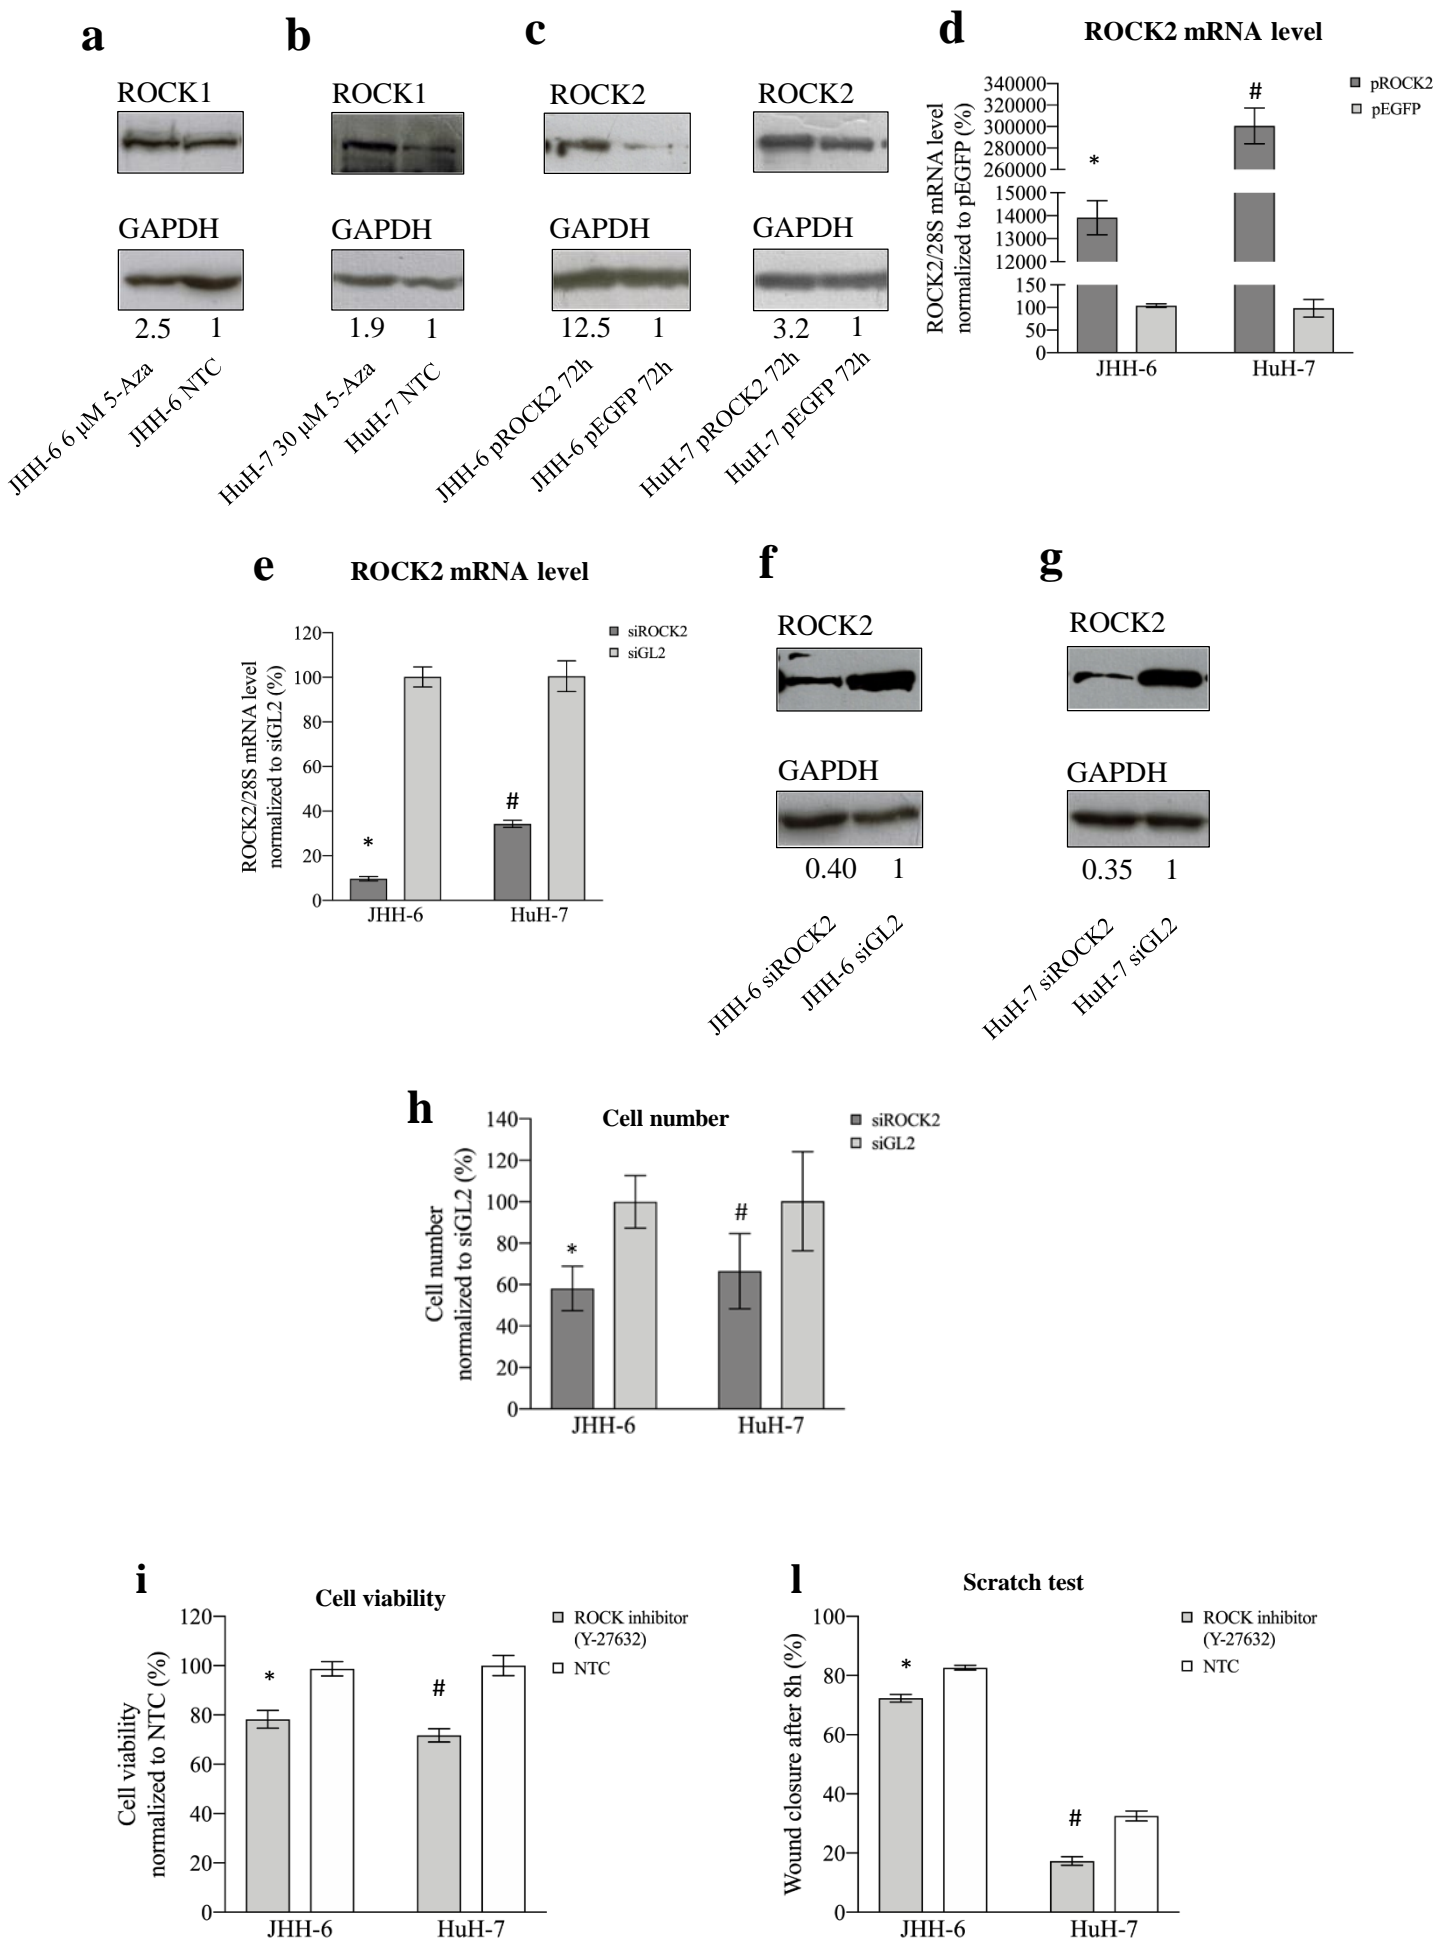

**m E2F1 mRNA level**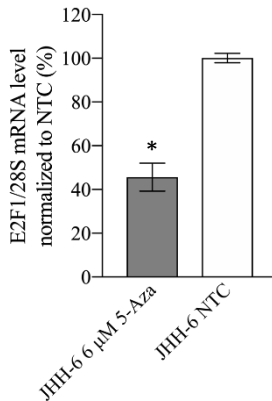**n E2F1 mRNA level**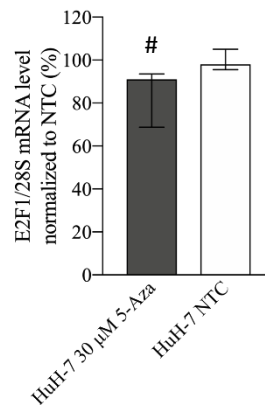

**a,b)** Effects of 5-Aza on *ROCK1* protein level. Representative blots: below each blot, the ratio ROCK1/GAPDH, normalized to non treated cells (NTC), is reported. **c)** *ROCK2* protein level following *ROCK2* overexpression. Representative blots: the ratio ROCK2/GAPDH, normalized to cells over-expressing EGFP (pEGFP, control), is reported (72 h after transfection). **d)** *ROCK2* mRNA level following *ROCK2* overexpression. Data normalized to 28S levels and to the average of pEGFP treated cells (control), are reported in % as mean  $\pm$  SEM, n=9; JHH-6 transfected by pEGFP vs JHH-6 transfected by pROCK2 \*p=0.0001; HuH7 transfected by pEGFP vs transfected by pROCK2 #p=0.0001; pEGFP/pROCK2 = plasmids expressing EGFP/ROCK2 respectively. **e)** *ROCK2* silencing by siRNA (*siROCK2*). Data normalized to 28S levels and to the average of siGL2 (control siRNA), are reported in % as mean  $\pm$  SEM, n=3, JHH-6/siGL2 vs JHH-6/siROCK2 \*p=0.0001; HuH-7/siGL2 vs HuH-7/siROCK2 #p=0.0001. **f,g)** Effects of *siROCK2* on *ROCK2* protein. Representative blots: below each blot, the ratio ROCK2/GAPDH, normalized to siGL2 treated cells (control), is reported. **h)** Cell number following *ROCK2* down regulation by *siROCK2*. Left: *ROCK2* silencing in JHH-6; data in %, normalized to the average of siGL2 (control siRNA) treated JHH-6 are expressed as mean  $\pm$  SEM, n=4, siROCK2 vs siGL2 \*p=0.021. Right: *ROCK2* silencing in HuH-7; data in %, normalized to the average of siGL2 treated HuH-7, are expressed as mean  $\pm$  SEM, n=3, siROCK2 vs siGL2 #p=0.006. **i)** Effects of *ROCK2* inhibition by Y-27632 on cell viability. Left: data in %, normalized to the average of non-treated cells (NTC) are expressed as mean  $\pm$  SEM, n=12, Y-27632/JHH-6 vs NTC/JHH-6 \*p=0.0002. Right: data in %, normalized to the average of NTC are expressed as mean  $\pm$  SEM, n=7, Y-27632/HuH-7 vs NTC/HuH-7 #p=0.0002. **j)** Effects of *ROCK2* inhibition by Y-27632 on cell migration (scratch assay). Left: data in %, normalized to the average of NTC are expressed as mean  $\pm$  SEM, n=3, Y-27632 JHH-6 vs NTC JHH-6 \*p=0.0001. Right: data in %, normalized to the average of NTC are expressed as mean  $\pm$  SEM, n=3, Y-27632/HuH-7 vs NTC/HuH-7 #p=0.0001. **m,n)** Effects of 5-Aza on *E2F1* mRNA level. Data normalized to 28S levels and to the average of NTC, are reported as mean  $\pm$  SEM (JHH-6) or as median with interquartile range (HuH-7), n=6, NTC/JHH-6 vs 6  $\mu$ M/JHH6 \*p=0.0001, NTC/HuH-7 vs 30  $\mu$ M/HuH-7 #p=0.0065.



# Figure S6

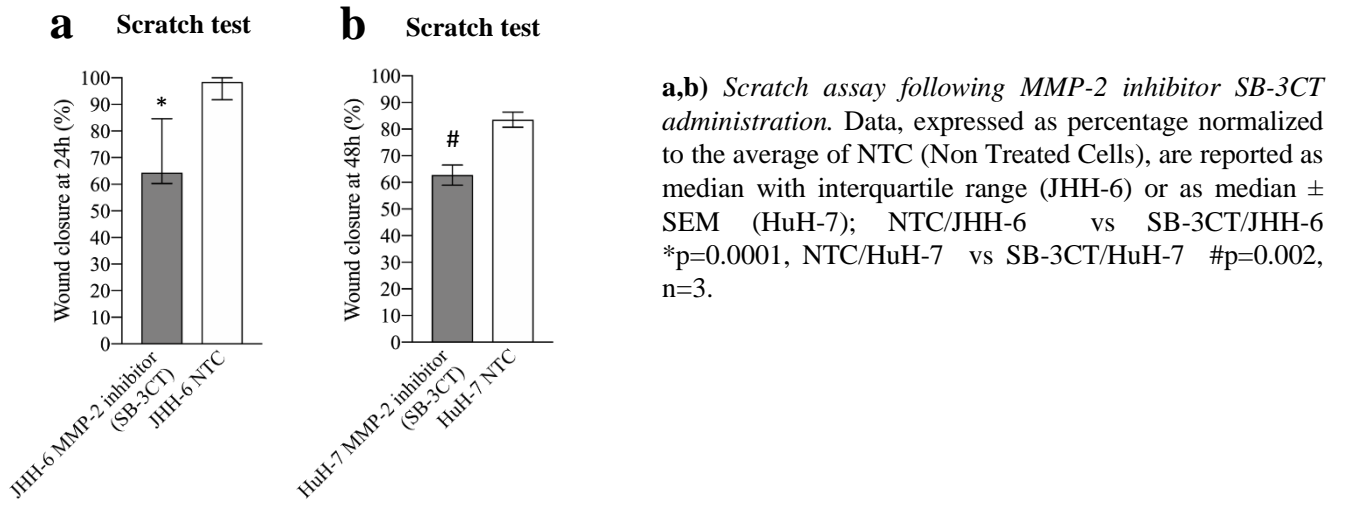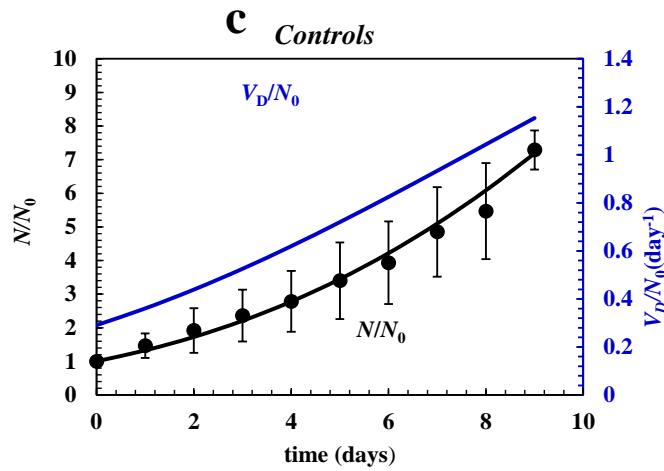

**c)** Best fitting of eq.(3) (black line) to tumor volume increase (black dots) referring to control samples depicted in Figure 9a.  $N/N_0$  is the ratio between cells number  $N$  (proportional to tumor volume) at time  $t$  and at the beginning ( $N_0$ , day 0).  $V_D/N_0$  represents the number of cells generated from each original cell after a given time. Vertical bars indicate data standard deviation. Fitting parameters read:  $k_D = (0.290 \pm 0.023) \text{ day}^{-1}$  and  $k_D = (0.066 \pm 0.021) \text{ day}^{-1}$ . Best fitting reliability is ensured by the  $F_{\text{test}}: F(1,8,095) < 956$ . Blue line represents the velocity of tumor volume increase evaluated according to eq.(4) and expressing the number of cells generated by each original cell after time  $t$ .

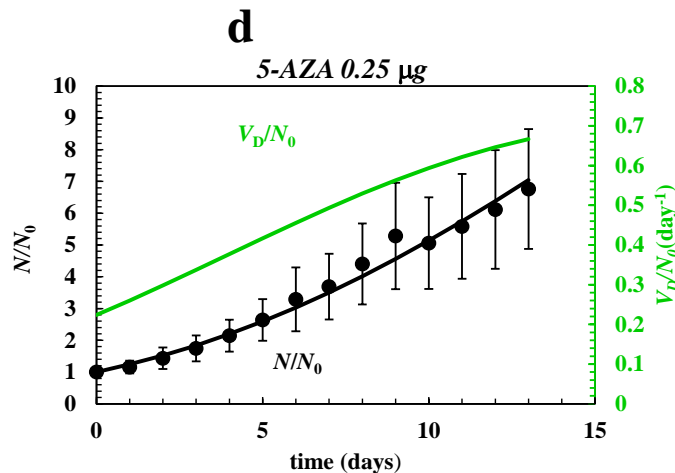

**d)** Best fitting of eq.(3) (black line) to tumor volume data (black dots) referring to animals treated with 5-AZA 0.25  $\mu\text{g}$  (see Figure 9a).  $N/N_0$  is the ratio between cells number  $N$  (proportional to tumor volume) at time  $t$  and at the beginning ( $N_0$ , day 0).  $V_D/N_0$  represents the number of cells generated from each original cell after a given time. Vertical bars indicate data standard deviation. Fitting parameters read:  $k_D = (0.224 \pm 0.012) \text{ day}^{-1}$  and  $k_f = (0.066 \pm 0.013) \text{ day}^{-1}$ . Best fitting reliability is ensured by the  $F_{\text{test}}: F(1,12,095) < 716$ . Green line represents the velocity of tumor volume increase evaluated according to eq.(4) and expressing the number of cells generated by each original cell after time  $t$ .

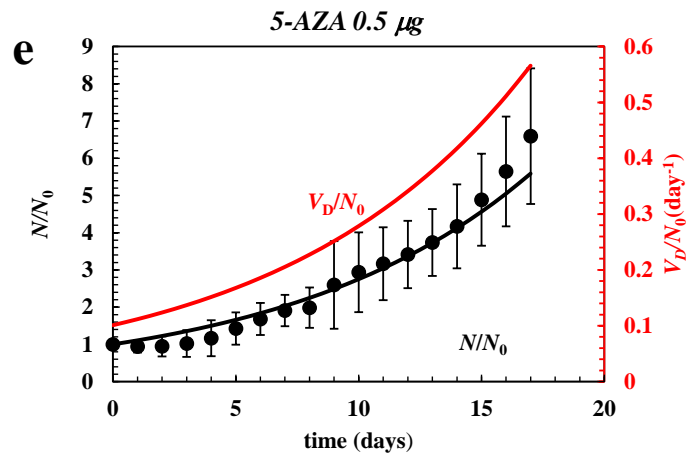

**e** Best fitting of eq.(3) (black line) to tumor volume data (black dots) referring to animals treated with 5-Aza 0.5  $\mu\text{g}$  (see Figure 9a).  $N/N_0$  is the ratio between cells number  $N$  (proportional to tumor volume) at time  $t$  and at the beginning ( $N_0$ , day 0).  $V_D/N_0$  represents the number of cells generated from each original cell after a given time. Vertical bars indicate data standard deviation. Fitting parameters read:  $k_D = (0.063 \pm 0.005) \text{ day}^{-1}$  and  $k_f = 0 \text{ day}^{-1}$ . Best fitting reliability is ensured by the  $F_{\text{test}}$ :  $F(1,16,095) < 24$ . Red line represents the velocity of tumor volume increase evaluated according to eq.(4) and expressing the number of cells generated by each original cell after time  $t$ .

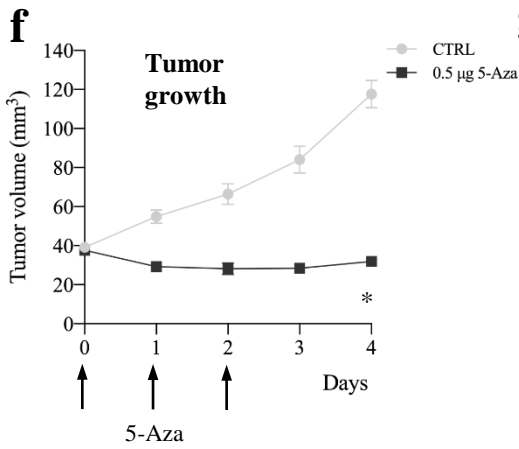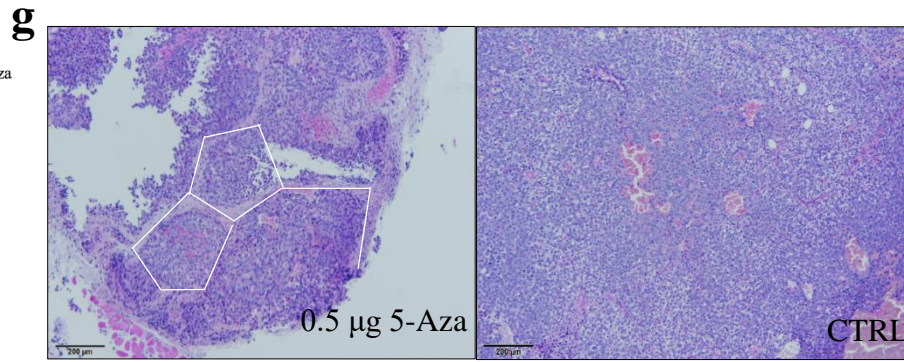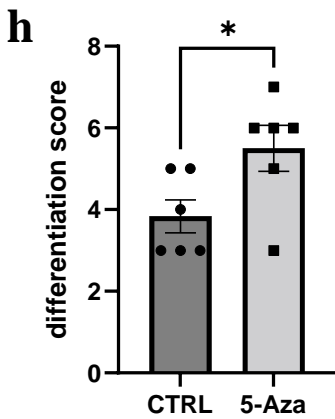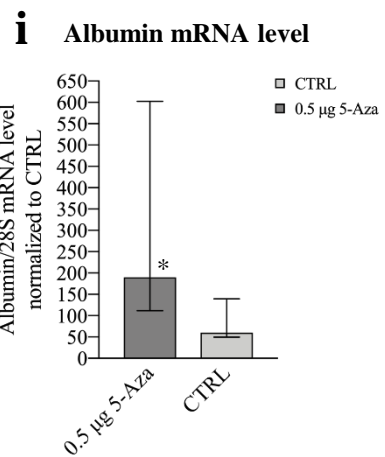

**f** Effects of 5-Aza on tumor growth. Comparison of tumor growth trend between 5-Aza-treated and control mice (CTRL). The arrows indicate the administration times for 5-Aza (0.5  $\mu\text{g}$  per injection); data are reported in  $\text{mm}^3$  as median  $\pm$  SEM,  $n=5$ , 5-Aza/day1-4 vs CTRL day/1-4  $p^*=0.044$ . **g** Representative images of hematoxylin-eosin stained tumor tissues from the short-term experiment (day 4). Left, tumor injected by 5-Aza, the white lines indicate the border of hepatic-like pseudo-lobules; right control non injected tumor; scale bar=200 $\mu\text{m}$ . **h** Effect of 5-Aza on tumor differentiation (day 4). A differentiation score was a sum of changes evaluating the differentiation of tumor cells, presence of fibrotic tissue and formation of pseudolobules. Data are reported as mean  $\pm$  SEM,  $n=6$ , CTRL vs 5-Aza  $*p=0.0366$ . **i** Effect of 5-Aza on albumin RNA level (day 4). Data normalized to 28S levels and to the average of CTRL, are reported in % as median with interquartile range,  $n=18$ , CTRL vs 5-Aza  $*p=0.0016$ .

**Figure S7**

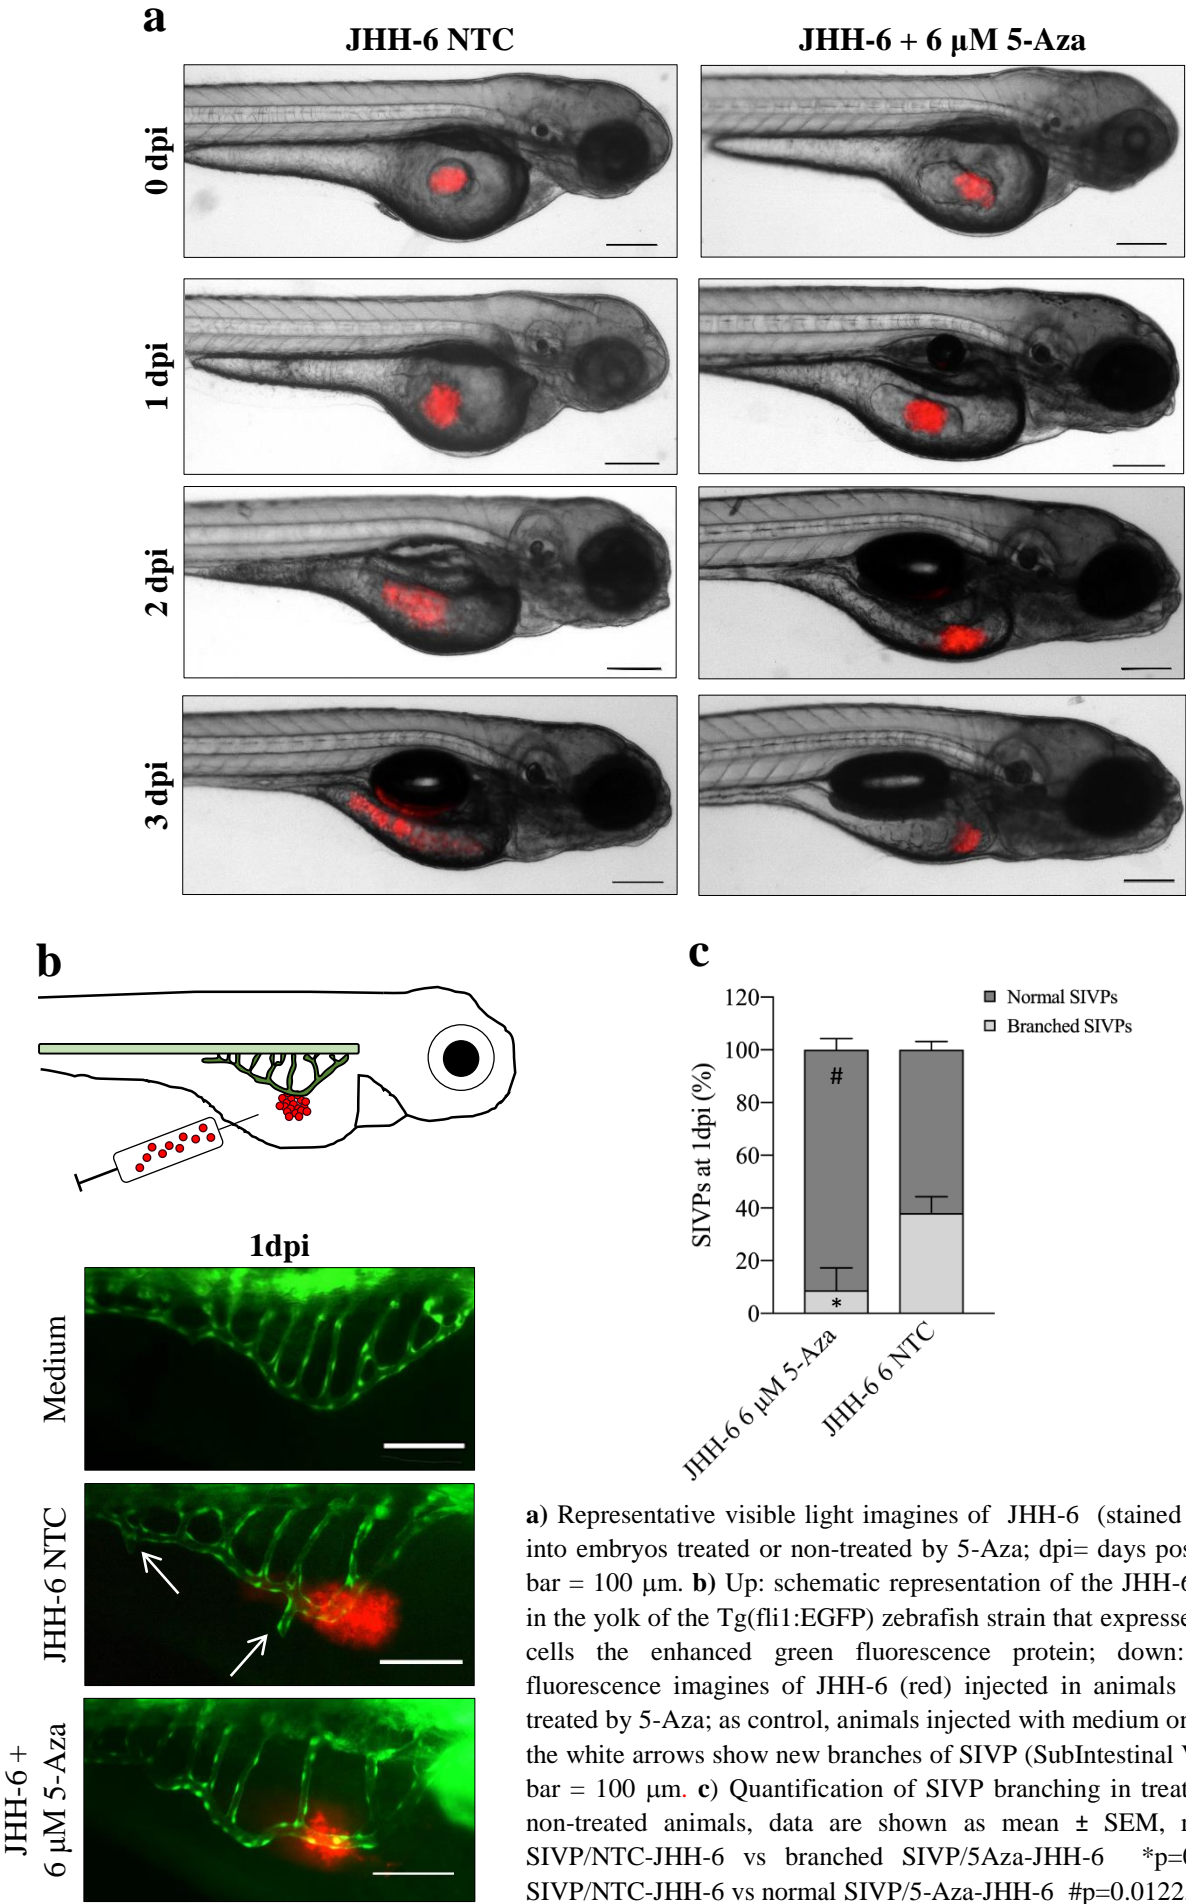

**a)** Representative visible light imagines of JHH-6 (stained in red) injected into embryos treated or non-treated by 5-Aza; dpi= days post cell injection, bar = 100  $\mu$ m. **b)** Up: schematic representation of the JHH-6 (red) injection in the yolk of the Tg(fli1:EGFP) zebrafish strain that expresses in endothelial cells the enhanced green fluorescence protein; down: representative fluorescence imagines of JHH-6 (red) injected in animals treated or non-treated by 5-Aza; as control, animals injected with medium only are reported; the white arrows show new branches of SIVP (SubIntestinal Vessels Plexus), bar = 100  $\mu$ m. **c)** Quantification of SIVP branching in treated (5-Aza) and non-treated animals, data are shown as mean  $\pm$  SEM, n=45, branched SIVP/NTC-JHH-6 vs branched SIVP/5Aza-JHH-6 \*p=0.0122, normal SIVP/NTC-JHH-6 vs normal SIVP/5-Aza-JHH-6 #p=0.0122,

**Figure S8**

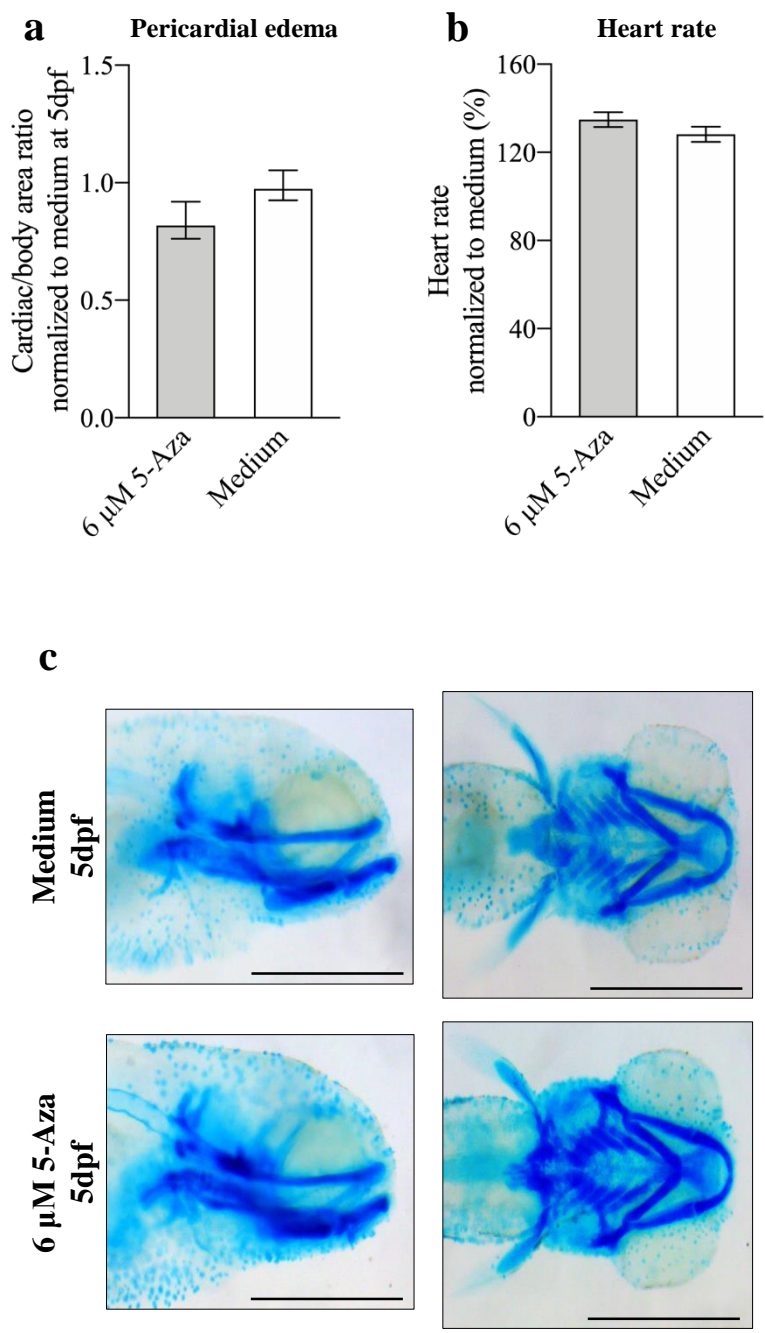

**a,b)** Evaluation of possible 5-Aza cardiac toxic effects in zebrafish. In A the effects on pericardial edema were evaluated; data, are expressed as median with interquartile range, n=30. In B the effects on heart rate were evaluated; data, are expressed as median with interquartile range, n=30. **c)** Evaluation of possible 5-Aza toxic effects on the osteo-cartilaginous system. Reported are representative imagines of the osteo-cartilagineous system (labelled by alcian blue solution) in non-treated (up) and 5-Aza treated animals (down), dpi= days post cell injection, bar = 500  $\mu$ m.



**Figure S9**

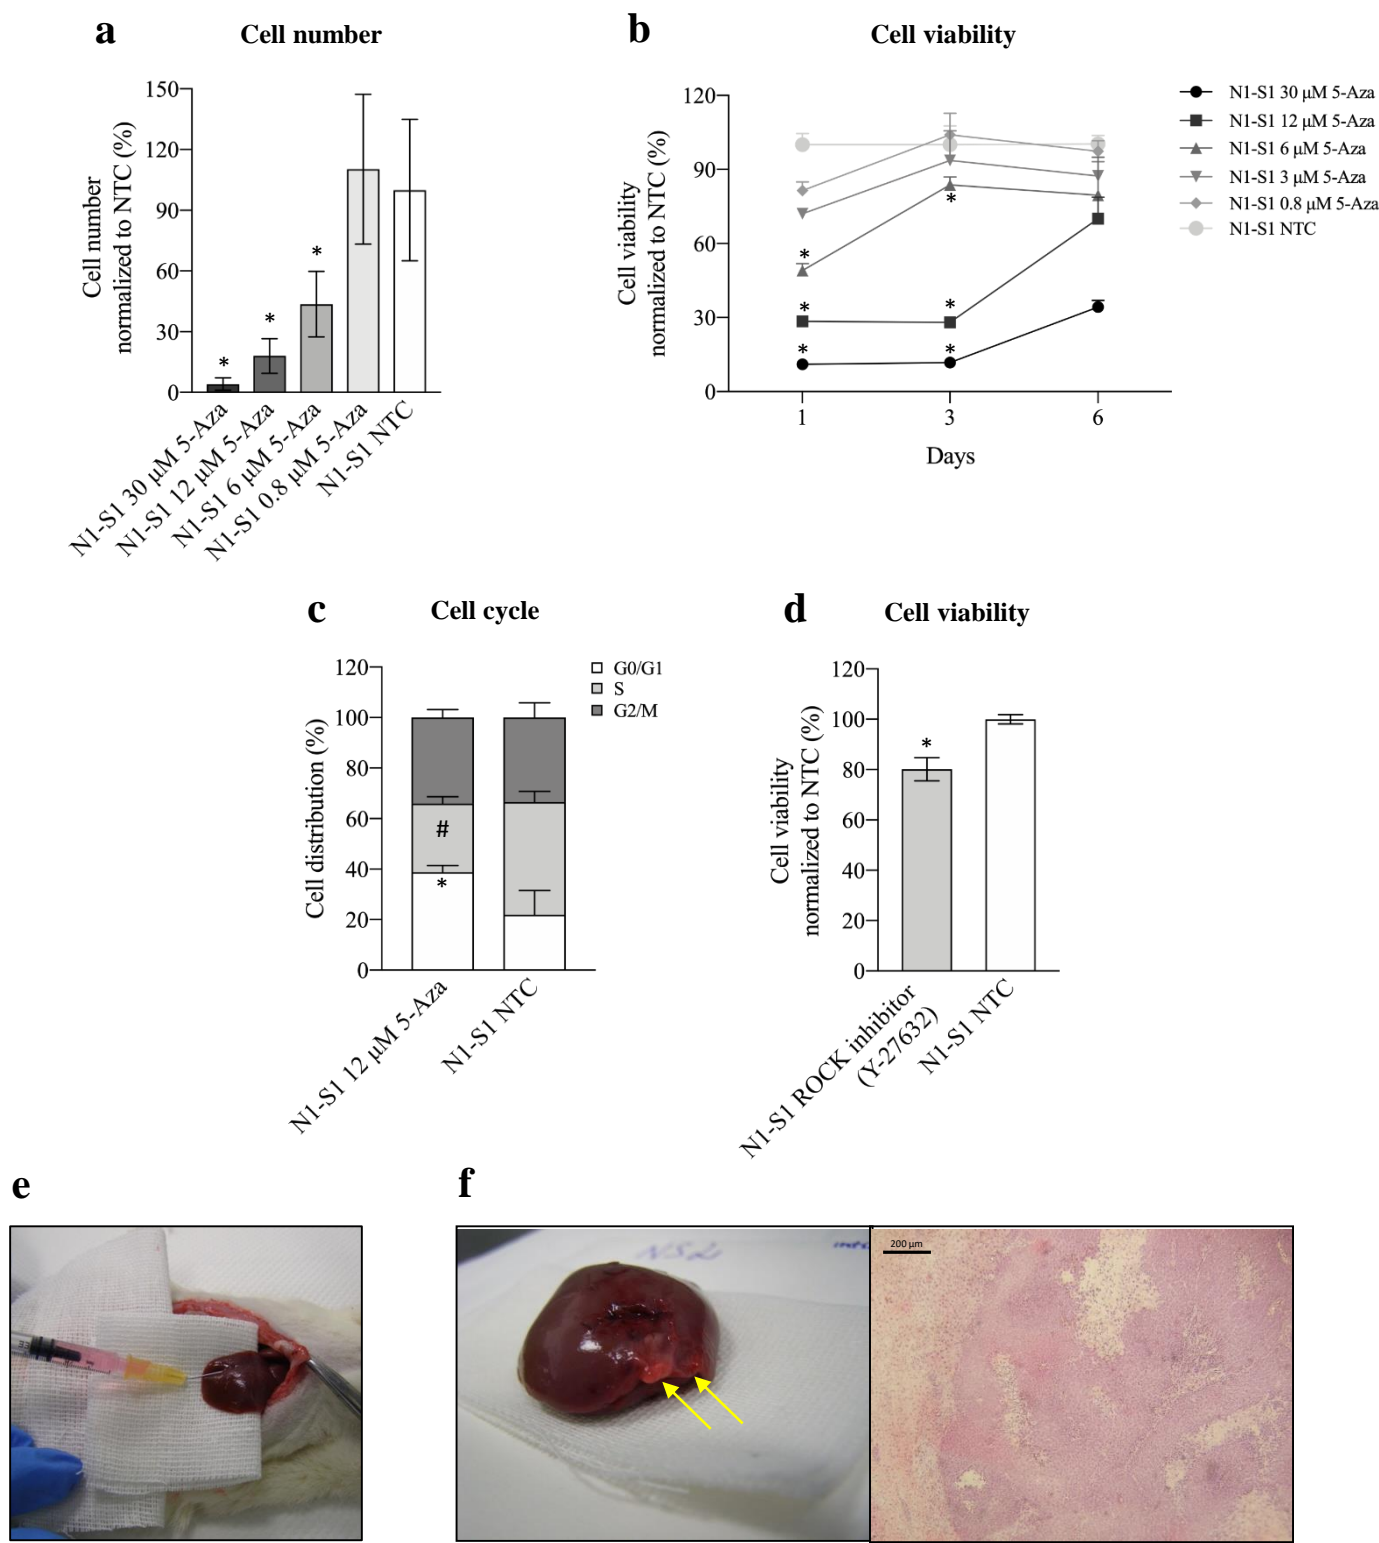

**a)** Effects of 5-Aza on N1-S1 number. Data, expressed as percentage normalized to the average of NTC (Non Treated Cells), are reported as mean  $\pm$  SEM, n=6, N1-S1 treated by 6/12/30  $\mu$ M 5-Aza vs N1S1 NTC \*p<0.0034. **b)** Effects of 5-Aza on N1-S1 viability. Data, expressed as percentage normalized to the average of NTC are reported as mean  $\pm$  SEM, n=9, N1-S1 treated by 6/12/30  $\mu$ M 5-Aza vs N1S1 NTC \*p<0.006. **c)** Effects of 5-Aza on N1-S1 cell cycle phase distribution. Data, expressed as percentage, are reported as mean  $\pm$  SEM, n=5, G0/G1-NTC vs G0/G1-12  $\mu$ M \* p=0.034, S-NTC vs S-12  $\mu$ M # p=0.018. **d)** Effect of ROCK2 inhibitor Y-27632 on N1-S1 viability. Data, expressed as percentage normalized to the average of NTC, are reported as mean  $\pm$  SEM, n=7, Y-27632/N1S1 vs NTC/N1-S1 \* p=0.0052. **e)** Inoculum of N1-S1 in the rat liver. **f)** Detection of tumor nodules in rat liver. A representative imagine of macroscopic (left, arrows) and histology (hematoxylin-eosin stained, scale bar=250  $\mu$ m ) features of tumor nodules.
