# Supplementary material for: 5-Azacytidine Downregulates the Proliferation and Migration of Hepatocellular Carcinoma Cells In Vitro and In Vivo by Targeting miR-139-5p/ROCK2 Pathway
Source: MDPI journal article supplement (doi:10.3390/cancers14071630), 2022-03-23
Supplement: s1 [file s1]

Figure 4

In red lanes reported  
In the manuscript

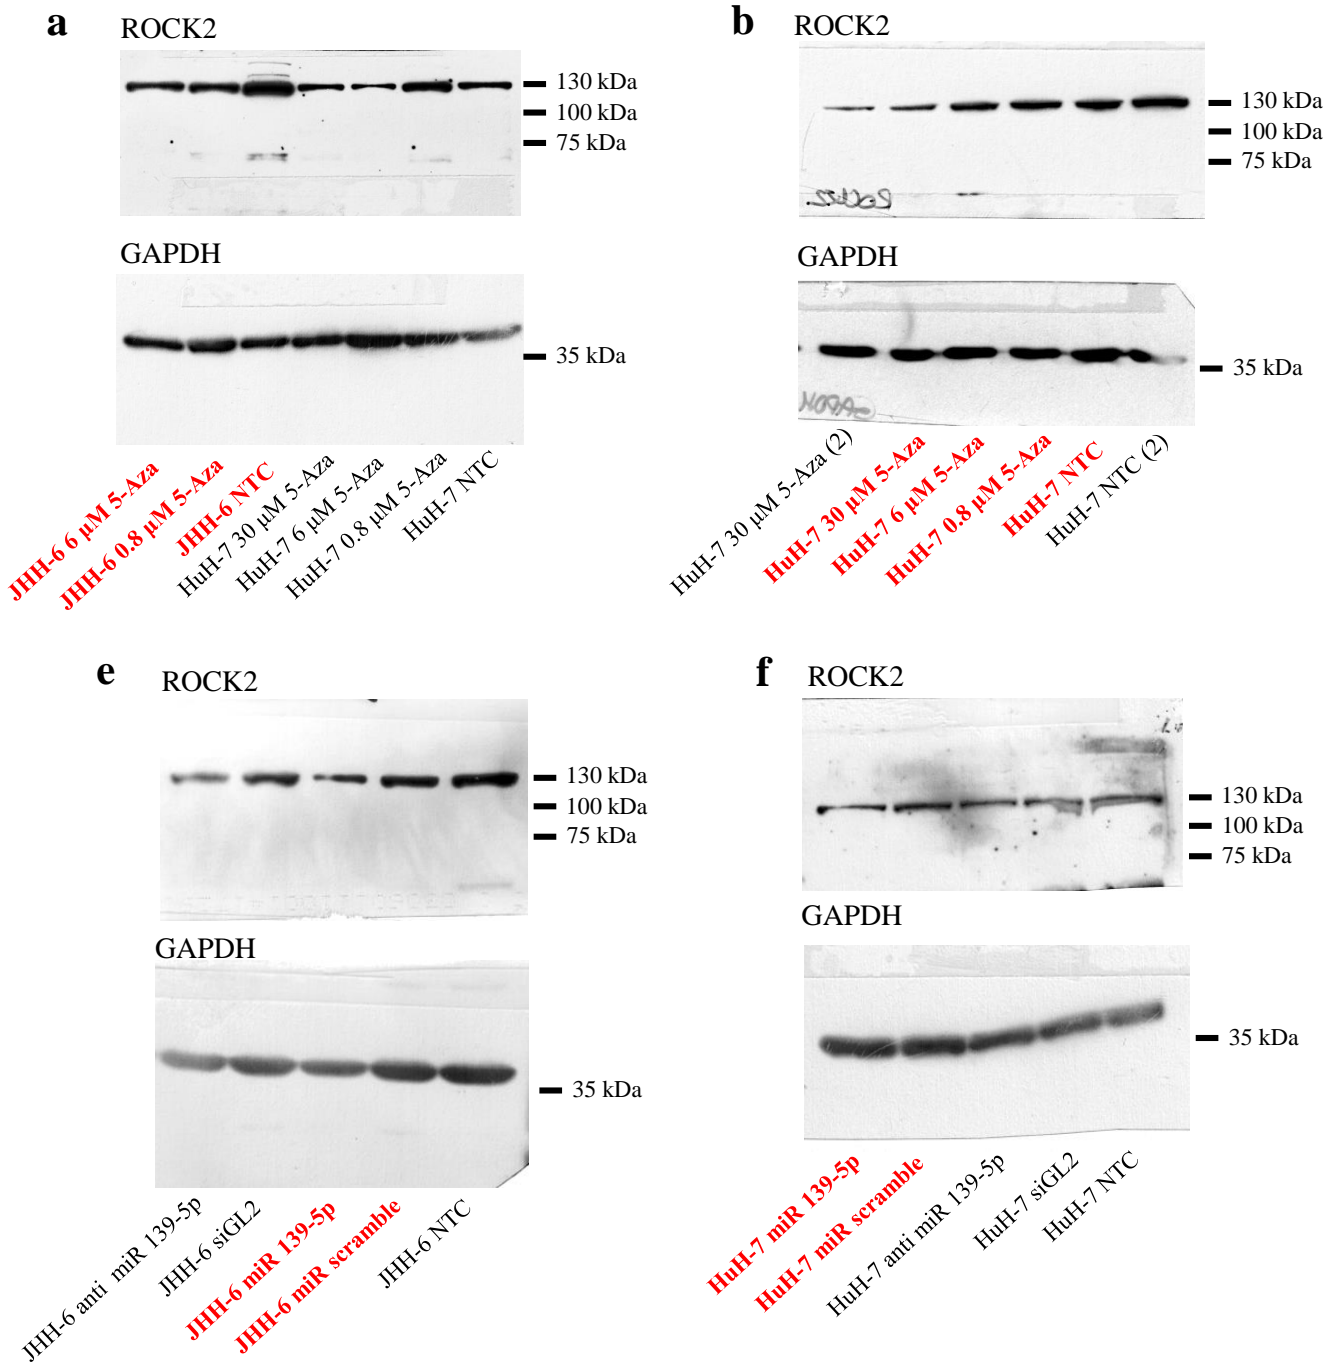

**Figure 6**

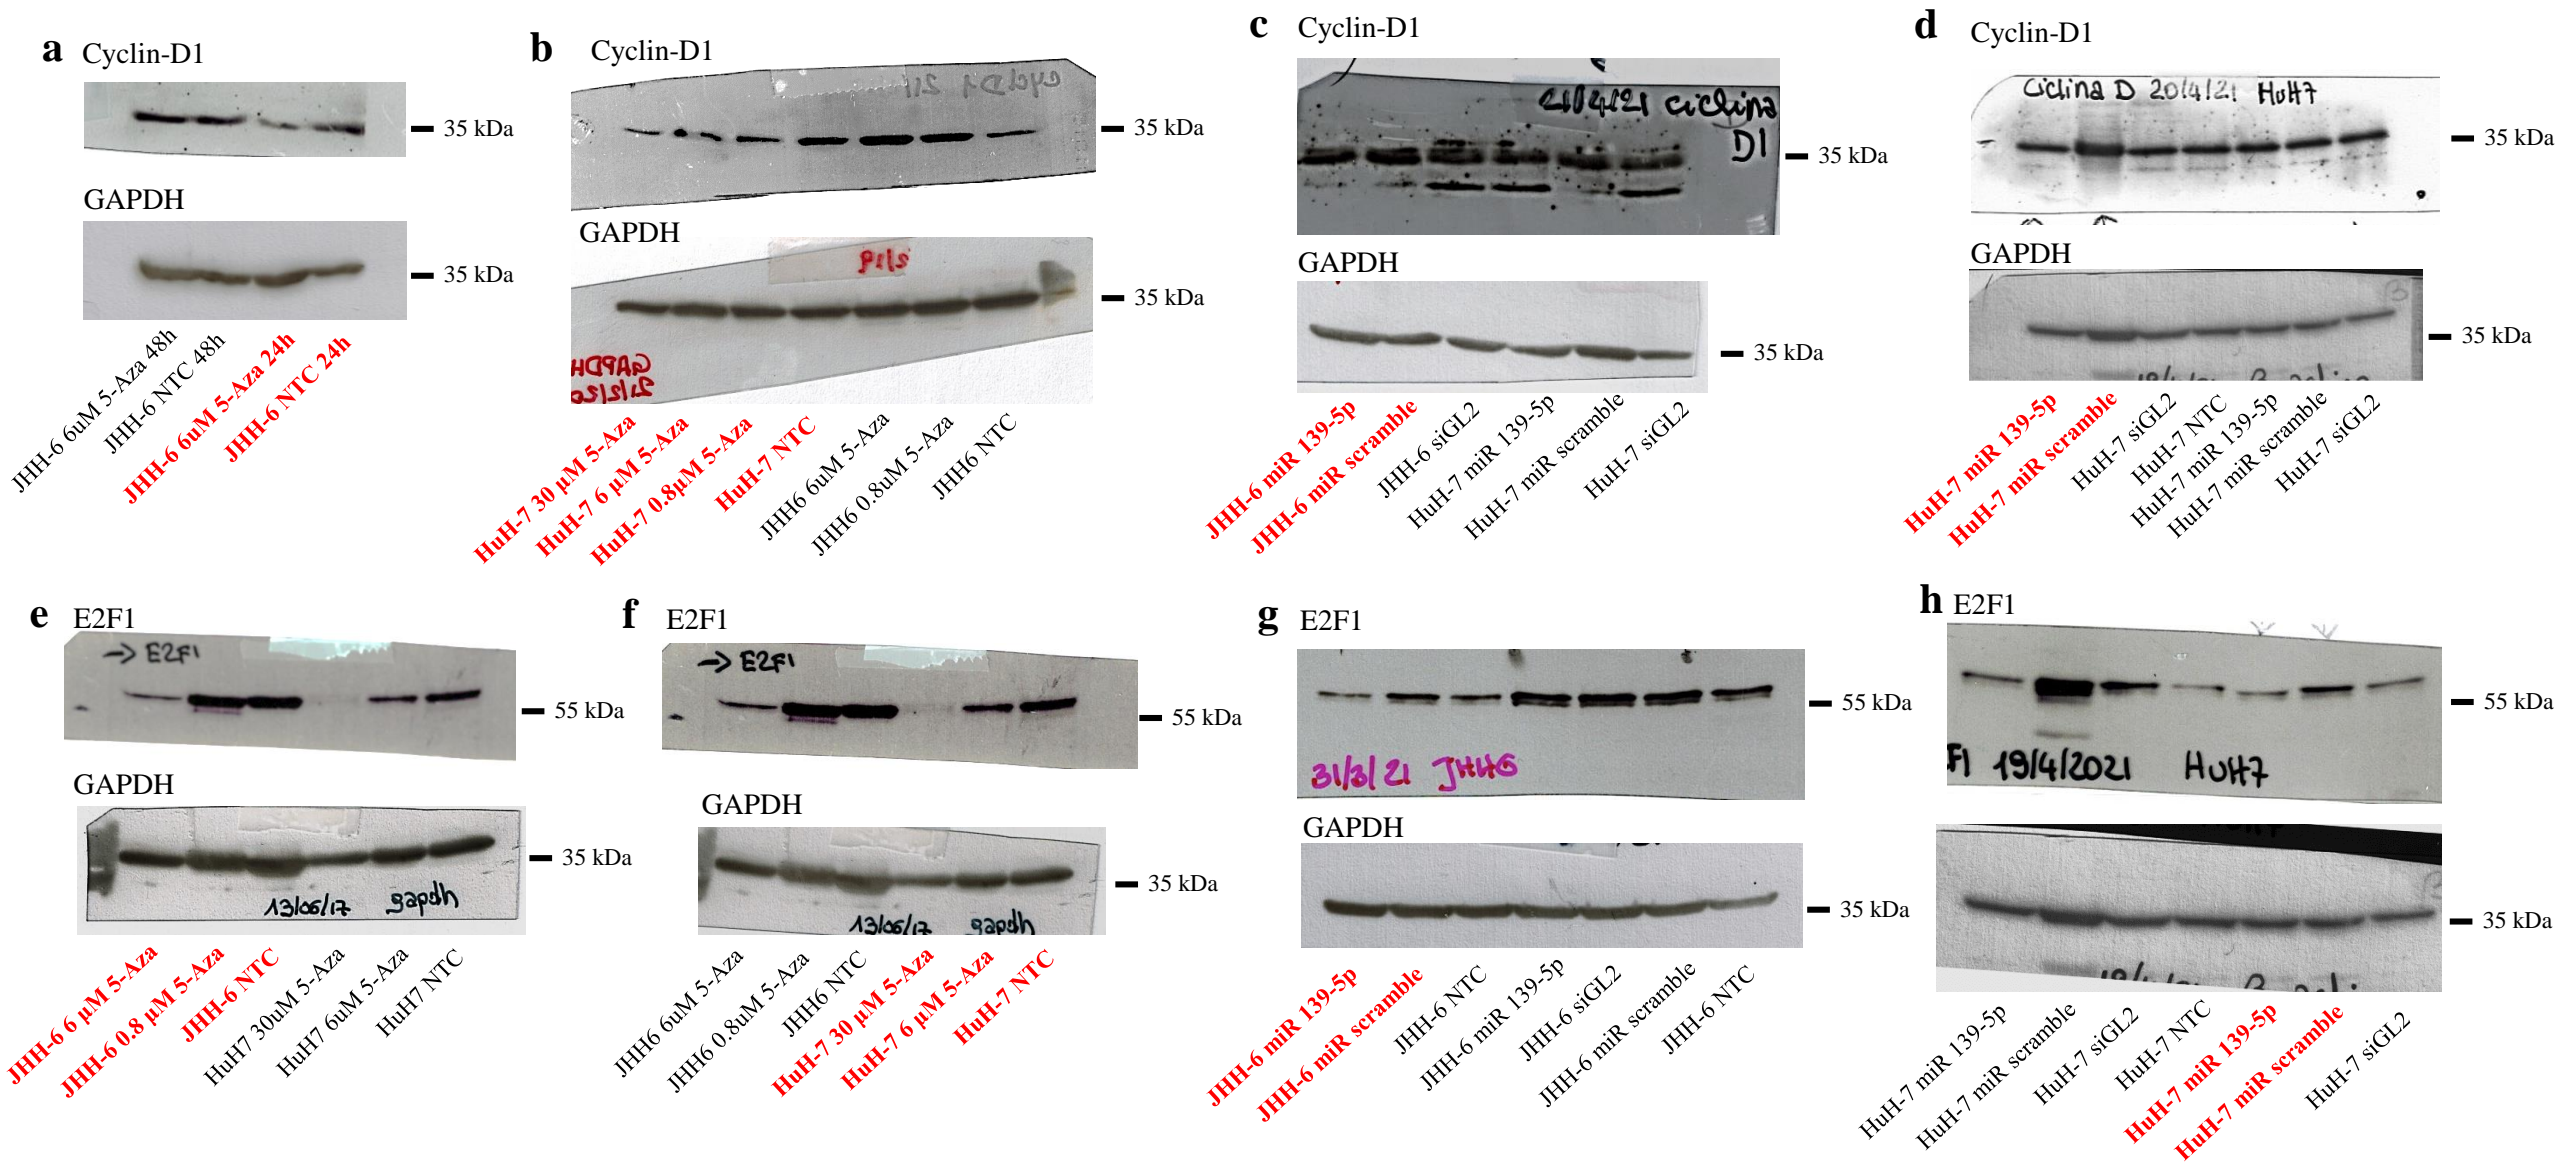

**Figure 7**

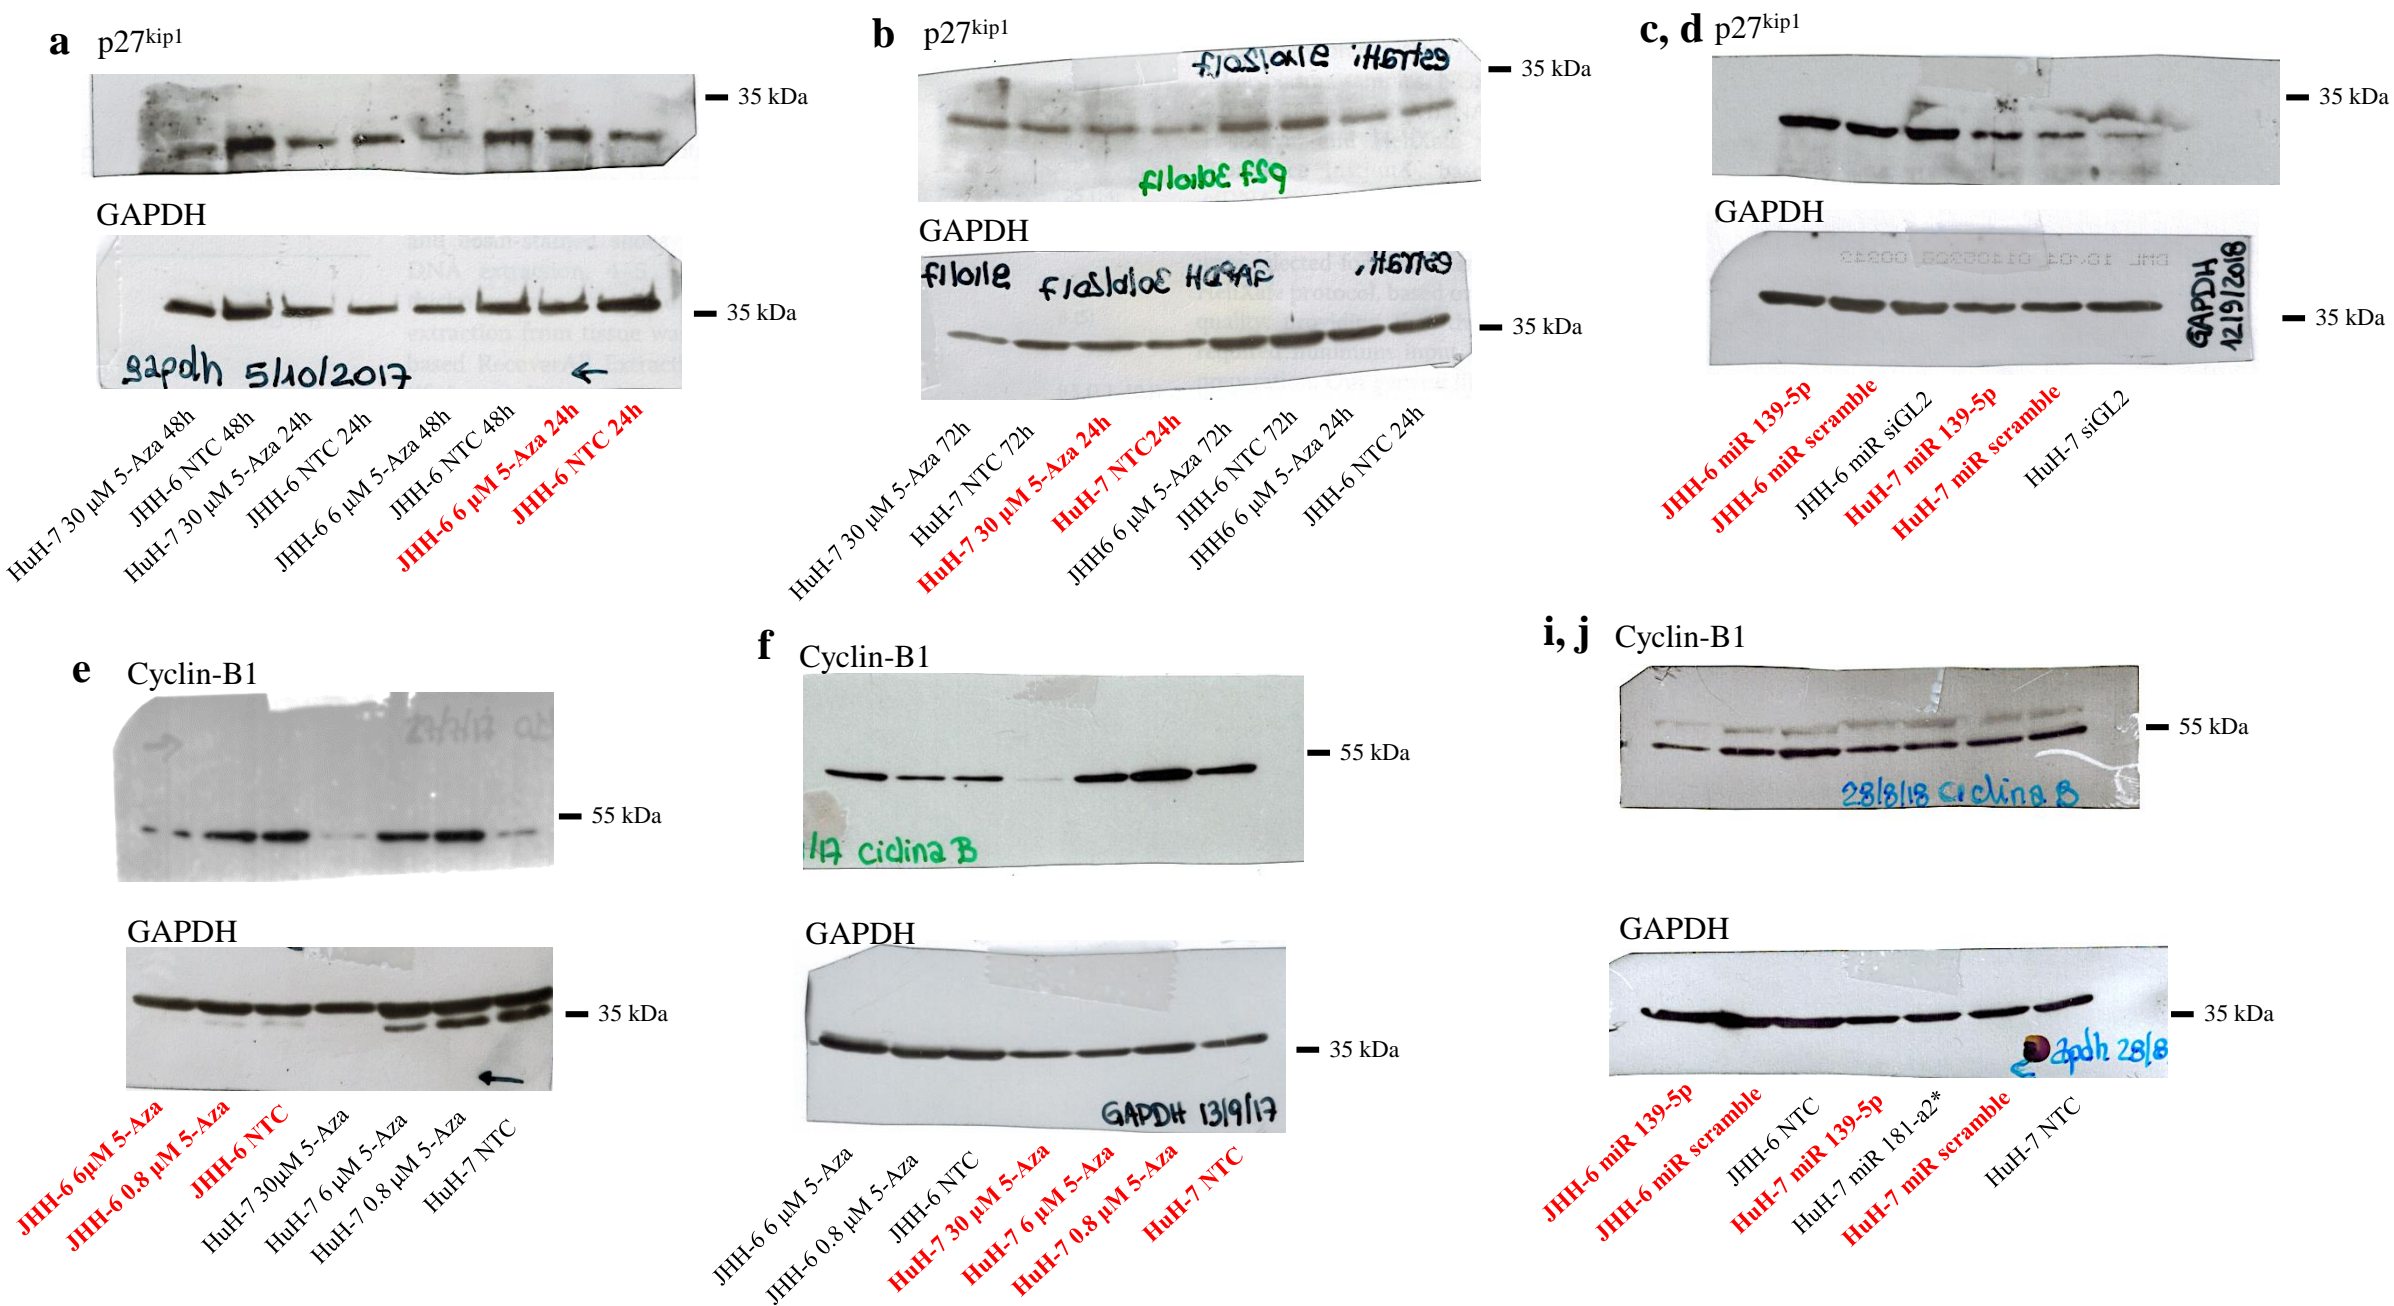

**Figure 8**

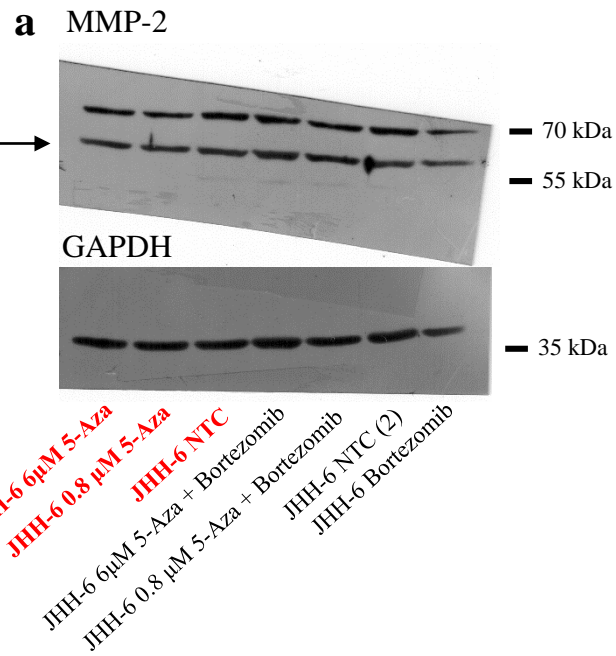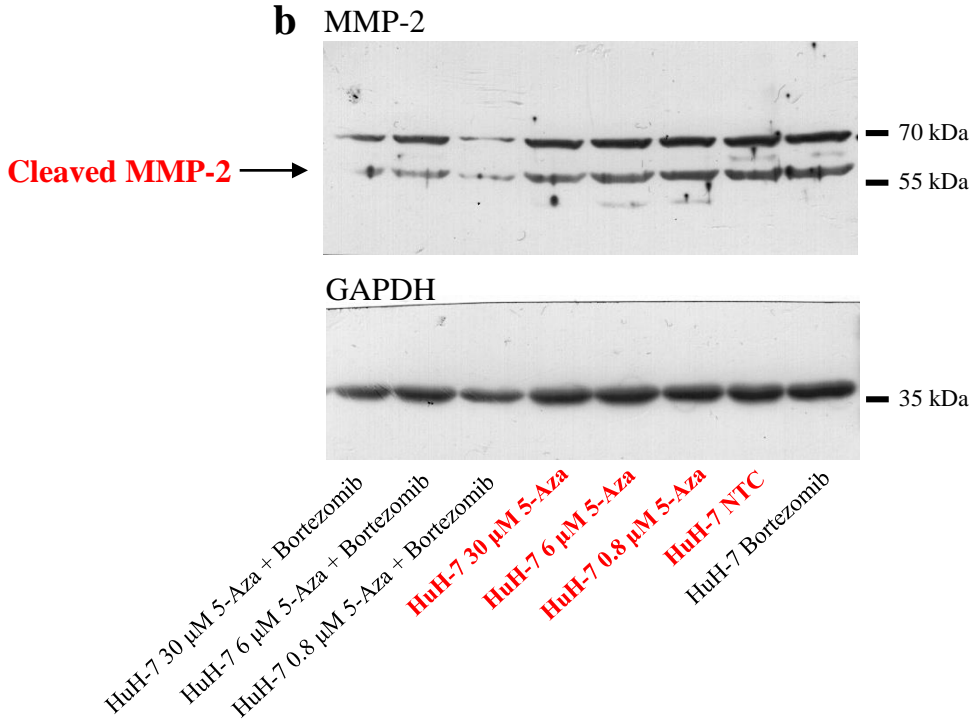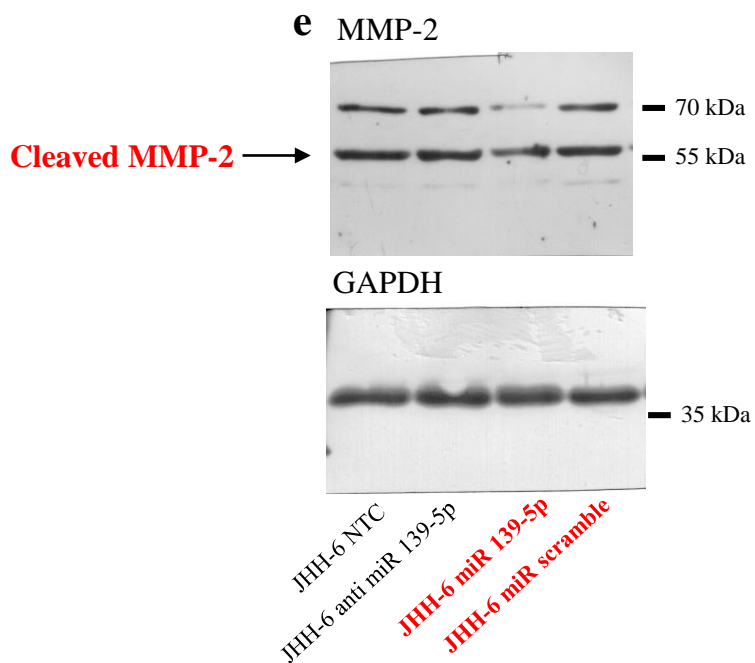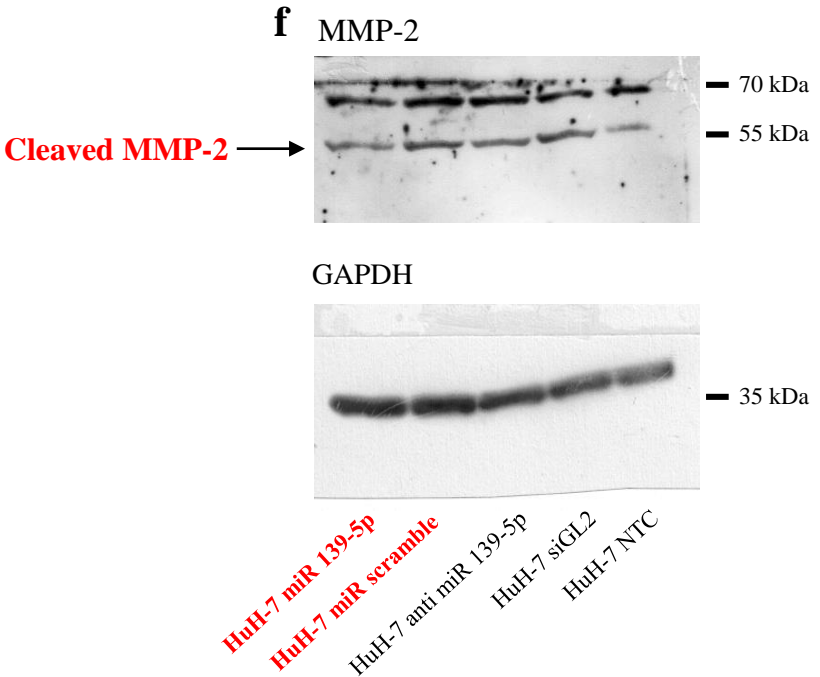



Supplementary data 5

**a** ROCK1

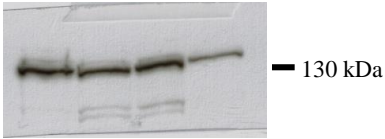

GAPDH

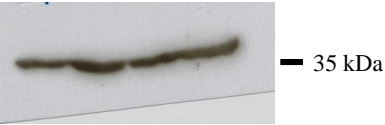

JHH-6 6  $\mu$ M 5-Aza 48h  
JHH-6 NTC 48h  
JHH-6 6  $\mu$ M 5-Aza 24h  
JHH-6 NTC 24h

**b** ROCK1

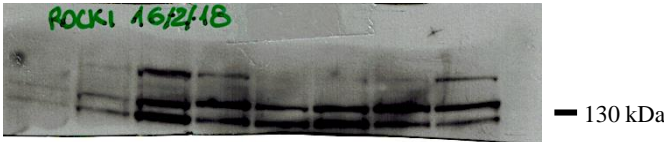

GAPDH

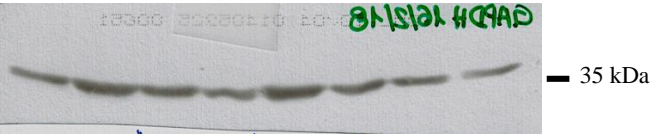

JHH-6 6  $\mu$ M 5-Aza  
JHH-6 NTC  
HuH-7 30  $\mu$ M 5-Aza  
JHH-6 siROCK1  
JHH-6 siGL2  
HuH-7 siROCK1  
HuH-7 siGL2

**c** ROCK2

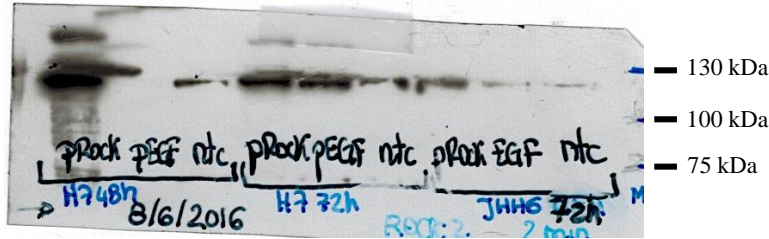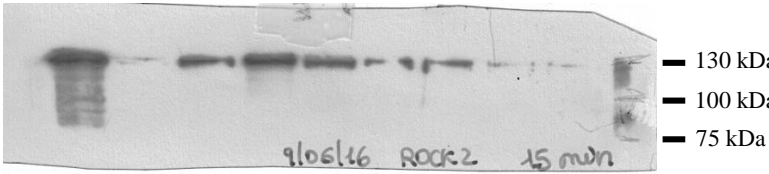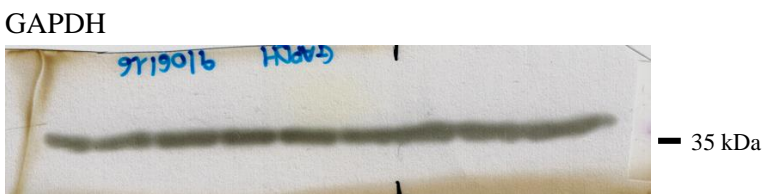

HuH-7 pROCK2 48h  
HuH-7 pEGFP 48h  
HuH-7 NTC 48h  
HuH-7 pROCK2 72h  
HuH-7 pEGFP 72h  
HuH-7 NTC 72h  
JHH-6 pROCK2 72h  
JHH-6 pEGFP 72h  
JHH-6 NTC 72h

**f, g** ROCK2

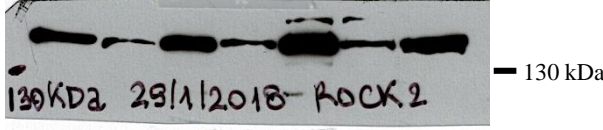

GAPDH

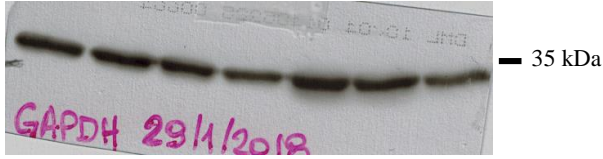

HuH-7 siROCK1  
HuH-7 siROCK2  
HuH-7 siGL2  
HuH-7 siE2F1  
JHH-6 siROCK1  
JHH-6 siROCK2  
JHH-6 siGL2
